# 1 **Brainstem somatostatin-expressing cells control the emotional** 2 **regulation of pain behavior**

3  
4 Nanci Winke<sup>§1,2</sup>, Frank Aby<sup>§3</sup>, Daniel Jercog<sup>§1,2</sup>, Grivet Zoé<sup>3</sup>, Delphine Girard<sup>1,2</sup>, Marc Landry<sup>3</sup>,  
5 Laia Castell<sup>4</sup>, Emmanuel Valjent<sup>4</sup>, Stephane Valerio<sup>\*1,2</sup>, Pascal Fossat<sup>\*3</sup> and Cyril Herry<sup>\*1,2</sup>

6  
7 <sup>1</sup>*Univ. Bordeaux, Neurocentre Magendie, U1215, 146 Rue Léo-Saignat, 33077 Bordeaux, France*

8 <sup>2</sup>*INSERM, Neurocentre Magendie, U1215, 146 Rue Léo-Saignat, 33077 Bordeaux, France.*

9 <sup>3</sup>*Institut des maladies neurodégénératives (IMN, CNRS UMR 5293), 146 Rue Léo-Saignat, 33077 Bordeaux, France.*

10 <sup>4</sup>*IGF, Montpellier, CNRS, INSERM, 34094 Montpellier, France.*

11

12 § shared authorship

13 \* shared seniority

## 14 **Abstract**

15

16 **In mammals, threat-related behavior is typically induced by a noxious physical stressor and**  
17 **is associated with a broad range of behavioral responses such as freezing and avoidance.**  
18 **These behavioral responses are associated with the regulation of pain responses allowing**  
19 **individuals to cope with noxious stimuli. Whereas the structures and mechanisms involved**  
20 **in pain behavior are well documented, little is known about the precise neuronal circuits**  
21 **mediating the emotional regulation of pain behavior. Here we used a combination of**  
22 **behavioral, anatomical, optogenetic, and electrophysiological approaches to show that**  
23 **somatostatin-expressing neurons in the ventrolateral periaqueductal gray matter (vlPAG**  
24 **SST cells) promote antinociceptive responses during the presentation of conditioned stimuli**  
25 **(CS) predicting footshocks. Whereas the optogenetic inhibition of vlPAG SST cells during**  
26 **CS presentation promoted analgesia, their optogenetic activation reduced analgesia by**  
27 **potentiating pain responses in the spinal cord through a relay in the rostral ventromedial**  
28 **medulla (RVM). Together these results identify a brainstem circuit composed of vlPAG SST**

29 **cells specifically projecting to the RVM and mediating fear conditioned analgesia (FCA) to**  
30 **regulate pain responses during threatful situations.**

31

## 32 **Introduction**

33       Displaying adaptive behavioral responses to threat-predicting stimuli is a fundamental process  
34 allowing mammals to survive. This process critically depends on the ability of mammals to  
35 associate specific cues with their harmful consequences and establish long-lasting predictions  
36 about future aversive outcomes. Freezing and avoidance are among the most studied behavioral  
37 responses in response to specific threat-predicting cues and are associated with a simultaneous  
38 regulation of pain responses allowing accurate behavioral responses<sup>1</sup>. Indeed, it is now widely  
39 accepted that specific threats can modulate pain processing through either a reduction (analgesia)  
40 or an increase (hyperalgesia) of pain sensitivity in case of acute and chronic threat exposure,  
41 respectively<sup>2-4</sup>. Moreover, recent reports in humans revealed a strong comorbidity between anxiety-  
42 related disorders and pain-related disorders<sup>5</sup>, suggesting that the deregulation of the neuronal  
43 circuits controlling pain processing could lead to the development of anxiety-related pathology. In  
44 addition, there is also a strong overlap between the neuronal structures mediating aversive learning  
45 and pain processing, including the medial prefrontal cortex (mPFC) and the periaqueductal grey  
46 (PAG), two central structures in fear and pain modulation<sup>6-9</sup>. An interesting model to study the  
47 emotional regulation of pain behavior is FCA<sup>2</sup>, in which a fearful event can lead to a reduction in  
48 pain sensitivity. Because the PAG is a midbrain structure receiving many cortical and subcortical  
49 inputs from structures involved in fear processing<sup>10-12</sup> and projecting to the spinal cord through a  
50 brainstem relay in the rostral ventromedial medulla<sup>6</sup> (RVM), it is ideally located to allow the  
51 emotional regulation of pain behavior. The ventrolateral part of the PAG (vIPAG) is crucial for the



52 descending control of pain in the dorsal horn of the spinal cord<sup>6</sup> (DH), and several reports indicated  
53 that electrical stimulation of the vIPAG selectively inhibits responses to noxious stimuli in a variety  
54 of pain test conditions<sup>6,8,13-15</sup>. Moreover, it has been documented that analgesia induced upon  
55 vIPAG stimulation is opioid-dependent<sup>16,17</sup> and involves direct descending projections to the RVM  
56 and the DH. In addition, recent data indicated that vIPAG activation induces analgesia through the  
57 recruitment of local GABAergic neurons, which is consistent with our knowledge on the role of  
58 the GABAergic system in the descending control of pain<sup>9,13,18</sup>. However, to date, the precise  
59 neuronal elements and circuits involved in FCA at the level of the vIPAG are still largely unknown.

60

## 61 **Results**

### 62 **FCA depends on associative learning**

63 To evaluate the contribution of specific vIPAG cells in the emotional modulation of pain  
64 behavior, we developed a novel fear conditioned analgesia (FCA) procedure during which mice  
65 were first submitted to a discriminative auditory fear conditioned paradigm followed by a pain  
66 sensitivity assay (**Figure 1a**). In this paradigm, an initially neutral stimulus (the conditioned  
67 stimulus, CS) is associated with a mild coincident aversive footshock (the unconditioned stimulus,  
68 US). Twenty-four hours following conditioning, re-exposure to CS associated with the US (CS<sup>+</sup>),  
69 but not to the control non-conditioned CS (CS<sup>-</sup>) promoted freezing behavior, which we used as a  
70 behavioral fear readout (**Figure 1a, b and Supplementary Figure 1a, b**). Following the fear  
71 retrieval session, mice were exposed to a hot plate test session (HP) in which the basal plate  
72 temperature was progressively increased (6°C per min), and paired with either the CS<sup>-</sup> or the CS<sup>+</sup>  
73 presentation until mice display a classical nociception response (**Supplementary Figure 1d**,  
74 **Material and Methods**). The CS<sup>-</sup> and CS<sup>+</sup> presentation order was counterbalanced across animals.

75 Interestingly, mice exposed to the CS<sup>+</sup> in the HP test exhibited a significant delay in the  
76 nociceptive response compared to CS<sup>-</sup> exposure, which reflected the development of a CS-specific  
77 analgesic response (**Figure 1c and Supplementary Figure 1c**).

78 To control that FCA was due to fear associative processes and not merely sensory processing of  
79 the CSs, several controls were performed. First, naïve mice were submitted to the HP test without  
80 CSs presentation (**Supplementary Figure 2a**). This test allowed us to measure the basal  
81 nociceptive response during the increasing-temperature HP test. Another group of naïve mice were  
82 submitted to the HP test with CSs presentations where the CS-US association was never reinforced  
83 (**Supplementary Figure 2a**). In both conditions, we failed to observe any analgesic responses  
84 (**Supplementary Figure 2c-d**). Second, mice were fear conditioned and tested in the HP test  
85 without CS presentations, a condition in which we observed analgesia (**Supplementary Figure**  
86 **2a-c**). Next, a subset of conditioned mice was submitted to an extinction procedure consisting of  
87 24 non-reinforced exposures to the CS<sup>+</sup>, which lead to complete inhibition of conditioned fear  
88 responses (**Figure 1d, e**). As expected, extinguished mice exposed to the HP test failed to exhibit  
89 FCA responses during CS<sup>+</sup> presentations. (**Figure 1f, g, and Supplementary Figure 2e**). Together  
90 these data indicate that FCA depends on associative processes and does not rely on sensory  
91 processing of the CS.

92 Furthermore, the FCA responses observed upon CS<sup>+</sup> exposure in the HP test were stable upon  
93 multiple exposures to the HP test (**Supplementary Figure 3a-e**) and not due to a competition with  
94 freezing responses evoked by the CS<sup>+</sup> as mice did not freeze before the nociceptive response  
95 (**Supplementary Figure 1d, e**).

96 The use of thermal nociception test in FCA has been reported to lead to possible erroneous  
97 interpretations. Indeed, the fearful stimulus can lead to vasoconstriction<sup>17</sup> which could result from  
98 a redirection of the blood flow to the skeletal musculature, thus decreasing the temperature in the

99 extremities of the body. If so, this phenomenon by itself could explain the delay observed for the  
100 nociceptive response during CS<sup>+</sup>. To further evaluate this possibility, we monitor changes in the  
101 back and tail temperature of mice submitted to the HP during CS<sup>-</sup> and CS<sup>+</sup> presentations without  
102 increasing the temperature of the HP device (**Supplementary Figure 3f-h**). Our results did not  
103 reveal any difference in tail or back temperature between CS<sup>-</sup> and CS<sup>+</sup> presentations, thereby ruling  
104 out a potential vasoconstriction effect that could explain our results.

105

### 106 **Inhibition of vIPAG SST cells mediate FCA**

107 Previous publications indicated that the ventrolateral PAG (vIPAG) is a critical region involved  
108 in analgesia<sup>8,9,14,15</sup>. To identify the cell types in the vIPAG mediating our analgesic effect in the  
109 FCA task, we focused on GABAergic neurons, which activity are supposed to be inhibited during  
110 analgesia through a  $\mu$ -opioid receptor-dependent (MOR) mechanism<sup>6,13,16</sup>. Because somatostatin-  
111 expressing interneurons (SST) are the most abundant inhibitory cell class in the PAG<sup>19</sup>, we focused  
112 on this cell population. We first evaluated the expression of *Sst* mRNAs in excitatory and inhibitory  
113 cell populations in the PAG of SST-Cre mice using single-molecule fluorescent in situ  
114 hybridization (smFISH, **see Methods**). Our results indicated that *Sst* mRNAs were expressed in  
115 both the dorsal PAG (dIPAG) and ventral PAG (vIPAG) with a high specificity (percent of *Sst*<sup>+</sup>  
116 cells among *Cre*<sup>+</sup> cells: dIPAG: 94%; vIPAG: 88%) and sensitivity (percent of *Cre*<sup>+</sup> cells among  
117 *Sst*<sup>+</sup> cells: dIPAG: 84%; vIPAG: 99%). We also noticed that *Sst*<sup>+</sup> cells were more abundant in the  
118 vIPAG compared to the dIPAG (**Figure 2a-c**). Moreover, when considering *Sst* mRNAs expression  
119 in inhibitory (*Slc32a1*<sup>+</sup> or *Vgat* cells) or excitatory (*Slc17a6*<sup>+</sup> or *Vglut2* cells) neurons, we observed  
120 that the vast majority of dIPAG *Sst* mRNAs were expressed in excitatory neurons (91% of *Slc17a6*<sup>+</sup>  
121 cells were *Sst*<sup>+</sup> cells). In contrast, the vast majority of vIPAG *Sst* mRNAs were expressed in  
122 inhibitory neurons (95% of *Slc32a1*<sup>+</sup> cells were *Sst*<sup>+</sup> cells; **Figure 2d-g**).

123 Next, to evaluate the contribution of vIPAG SST inhibitory neurons in FCA, SST-Cre mice were  
124 injected in the vIPAG with a Cre-dependent AAV expressing the Channelrhodopsin (ChR2),  
125 Archaelhodopsin (ArchT), or GFP and optic fiber were implanted above the area of interested and  
126 submitted to the FCA task (**see Methods; Figure 3a, b**). Following conditioning, mice displayed  
127 a significant increase in freezing behavior during CS<sup>+</sup> compared to CS<sup>-</sup> presentations or baseline  
128 activity (**Figure 3c, e**). Moreover, the conditioning levels during retrieval were not different  
129 between opsin and control groups (**Supplementary Figure 4a-d**). In the HP test following fear  
130 retrieval, the optogenetic activation of SST cells in the vIPAG during CS<sup>-</sup> had no effect, whereas  
131 the same manipulation performed during CS<sup>+</sup> blocked the analgesic effect compared to GFP  
132 controls (**Figure 3d and Supplementary Figure 5a**). Conversely, optogenetic inhibition of vIPAG  
133 SST cells promoted analgesia in both CS<sup>-</sup> and CS<sup>+</sup> conditions in comparison to GFP controls  
134 (**Figure 3f and Supplementary Figure 5b**). Importantly, we controlled that the increased delay  
135 and temperature at which mice displayed the nociceptive response during optogenetic manipulation  
136 of vIPAG SST cells was not due to motor or aversive components by submitting SST-Cre mice to  
137 optogenetic manipulation in an open field and a real-time place avoidance task (**Supplementary**  
138 **Figure 5c-f**). Moreover, the optogenetic effect observed during FCA was not due to alteration of  
139 somatostatin levels in our homozygous SST-Cre mice as we observed the same effect in  
140 heterozygous SST-Cre mice (**Supplementary Figure 6a-d**). Finally, and in striking contrast with  
141 vIPAG STT cells, the optogenetic inhibition of another important class of vIPAG inhibitory  
142 neurons expressing the vasoactive intestinal peptide (VIP) did not change the analgesic levels  
143 observed during CS<sup>-</sup> or CS<sup>+</sup> presentations (**Supplementary Figure 6e-h**). Together, these data  
144 demonstrate that the selective inhibition of vIPAG SST cells promoted analgesia, whereas its  
145 activation suppressed FCA during CS<sup>+</sup> presentations.

147 **Activation of vIPAG SST cells reduced fear expression and promoted spinal cord-related**  
148 **pain signals**

149 Because our novel FCA paradigm is dependent on fear associative processes (**Figure 1e-g and**  
150 **Supplementary Figure 2**), it is possible that the optogenetic manipulation of vIPAG SST cells  
151 may have altered the expression of aversive memories (i.e., freezing) and thereby the expression  
152 of FCA. To control for this possibility, we optogenetically activated or inhibited vIPAG SST cells  
153 during a fear retrieval session 24 hrs following auditory fear conditioning (**Figure 4a**). Our data  
154 indicate that whereas the optogenetic inhibition of vIPAG SST cells had no effect on fear  
155 expression relative to GFP controls, their optogenetic activation reduced fear expression (**Figure**  
156 **4b-c**). Importantly, the optogenetic activation of vIPAG SST cells did not modify fear learning  
157 when delivered concomitantly to the US (**Supplementary Figure 7**). These data clearly indicated  
158 that the manipulation of vIPAG SST cells did not interfere with the acquisition of conditioned fear  
159 behavior but that the activation of vIPAG SST cells impaired fear expression. These results have  
160 significant consequences as they might represent a main confound for the reduction in FCA  
161 observed during the optogenetic activation of vIPAG SST cells in the HP test during CS<sup>+</sup>  
162 presentations (**Figure 3**). Indeed, the reduction of the response latency and temperature observed  
163 in the HP test could have been due to a decrease in freezing behavior rather than a direct reduction  
164 of FCA induced by vIPAG SST cells activation.

165 To control for this possibility, we reasoned that activation of vIPAG SST cells might reduce  
166 FCA in the HP test by promoting nociception directly at the level of the spinal cord DH. Therefore,  
167 we performed extracellular recording of the spinal cord network before, during, and after  
168 optogenetic stimulation of vIPAG SST cells in mice under anesthesia to determine if nociceptive-  
169 mediated field potentials were modified by the optogenetic activation or inhibition of vIPAG SST  
170 cells (**Figure 5a**). Our results indicated that the optogenetic activation of vIPAG SST cells during

171 suprathreshold electrical stimulation of the paw potentiated, whereas their optogenetic inhibition  
172 reduced, nociceptive field potentials (**Figure 5b, c**). To determine if this effect was specific for the  
173 nociceptive network, we recorded wide dynamic range (WDR) neurons in the DH, known to  
174 receive both tactile and nociceptive information. Suprathreshold C-fiber stimulations induced a fast  
175 burst of spikes (0-80 ms), mediated by large-diameter myelinated non-nociceptive fibers, followed  
176 by a slow burst of spikes (80-150 ms) mediated by low diameter unmyelinated nociceptive C-fiber  
177 (**Figure 5a bottom**). Interestingly, the optogenetic activation of vIPAG SST cells increases both  
178 responses, with a larger effect on nociceptive C-fibers (**Figure 5d**). Conversely, the optogenetic  
179 inhibition of vIPAG SST cells specifically inhibited nociceptive responses while non-nociceptive  
180 responses remained unaffected (**Figure 5e**). To confirm that vIPAG SST cells manipulation acts  
181 predominantly on the nociceptive network, we performed two additional experiments. First, under  
182 conditions in which subthreshold electrical stimulations failed to elicit WDR neuronal responses,  
183 we observed that the optogenetic activation of vIPAG SST cells promoted WDR responses at a  
184 latency corresponding to nociceptive fibers (**Figure 5f**). Second, we performed a windup protocol  
185 inducing WDR short-term sensitization specific of nociceptive networks (**see Methods**). Our  
186 results indicated that windup amplitude increased when vIPAG SST cells were activated and  
187 decreased when vIPAG SST cells were inhibited compared to GFP controls (**Supplementary**  
188 **Figure 8**). Consistent with our observation in freely moving mice in the HP test, these data strongly  
189 suggest that activation and inhibition of vIPAG SST cells decreased and increased FCA by  
190 specifically promoting nociception and antinociceptive responses in the spinal cord DH,  
191 respectively.

192

193 **vIPAG SST cells mediating FCA contact RVM spinal cord-projecting neurons**

194 These data raise the question of whether vIPAG SST cells mediate their pronociceptive effect  
195 by contacting directly WDR neurons in the spinal cord or alternatively by contacting center  
196 structures projecting to the spinal cord. To address this question, we performed anatomical tracing  
197 in mice injected in the vIPAG with a Cre-dependent AAV expressing GFP. Our analyses revealed  
198 massive labeling of SST fibers in the rostral ventromedial medulla (RVM) (**Figure 6a, b**) and  
199 sparse labeling within the spinal cord but not in the DH where nociceptive projections neurons are  
200 present (data not shown). Importantly, in the same animals, fluorogold retrograde labeling of RVM  
201 neurons projecting to the DH revealed close apposition of SST putative boutons and RVM neurons  
202 projecting to the DH (**Figure 6d**), indicating that vIPAG SST cells project to the RVM and contact  
203 DH-projecting RVM neurons. To address the function of these indirect vIPAG SST cells inputs to  
204 the DH, we performed optogenetic activation of vIPAG SST inputs in the RVM (**Figure 6e**) while  
205 recording from WDR neurons during electrical stimulation of the paw. Optogenetically activating  
206 vIPAG SST inputs in the RVM resumed the WDR pain-response potentiation observed by  
207 stimulating vIPAG SST compared to GFP controls (**Figure 6e-g and Supplementary Figure 9**).  
208 Importantly, to exclude the contribution of potential “en passant” fibers projecting directly to the  
209 spinal cord, we performed recordings of WDR neurons while directly optogenetically manipulating  
210 descending fibers above the dorsal column. In contrast to direct vIPAG SST cells manipulation that  
211 increased nociceptive response, the optogenetic manipulation of vIPAG SST inputs in the DH had  
212 no effect on nociceptive transmission (**Figure 6h**). To further confirm in behaving animals that  
213 activation of vIPAG SST neurons projecting to the RVM mediate FCA without interfering with  
214 freezing behavior, SST cre mice were injected in the vIPAG with an AAV expressing ChR2 and  
215 optic fibers placed above the RVM (**Figure 7a**). We first observed that activating vIPAG SST  
216 neurons projecting to the RVM had no effect on fear expression (**Figure 7 b**) supporting the notion  
217 that freezing behavior and FCA are mediated by distinct pool of vIPAG SST neurons. Next, another

218 cohort of AAV injected mice were fear conditioned and tested in the HP test. Following  
219 conditioning, mice displayed a significant increase in freezing behavior during CS<sup>+</sup> compared to  
220 CS<sup>-</sup> presentations or baseline activity (**Figure 7c**). In the HP test following fear retrieval, the  
221 optogenetic activation of vIPAG SST terminals in the RVM during CS<sup>-</sup> had no effect, whereas the  
222 same manipulation performed during CS<sup>+</sup> blocked the analgesic effect compared to GFP controls  
223 (**Figure 7d**). Altogether, these data clearly demonstrate that vIPAG SST mediates FCA by  
224 contacting RVM neurons projecting to the DH and suggest the existence of two populations of  
225 vIPAG SST neurons mediating respectively FCA and freezing behavior.

226

## 227 **Discussion**

228 In this study, we demonstrated that inhibitory SST neurons located within the vIPAG are  
229 causally involved in the regulation of pain responses during a threatful situation. First of all, our  
230 data indicate that the development of FCA as shown with a reduction in thermal pain sensitivity  
231 following cued fear conditioning depends on associative processes. Moreover, the use of a cue as  
232 a conditioned stimulus instead of a context allows for a time-marked onset and offset. We argue  
233 that using a cue makes the FCA model more suitable for time-controlled manipulations such as  
234 optogenetics and electrophysiology recordings. To our knowledge, this is the first demonstration  
235 of a conditioned analgesia paradigm using a cue as a CS instead of a context.

236 Second, our data indicate that the activation of vIPAG SST neurons impaired FCA, whereas  
237 their inhibition increases analgesia in a CS-independent manner. Third, we observed that activation  
238 and inhibition of vIPAG SST cells decreased and increased FCA by specifically promoting  
239 pronociceptive and antinociceptive responses in the spinal cord DH. Finally, we demonstrated that  
240 vIPAG SST mediates FCA by contacting RVM neurons projecting to the DH. Together these



241 results identify a novel brainstem circuit composed of vIPAG SST cells specifically projecting to  
242 the RVM and mediating FCA to regulate pain responses during threatful situations.

243 Our observation that the optogenetic activation of vIPAG SST cells reduced FCA by promoting  
244 pronociception at the spinal cord while simultaneously impacting freezing behavior opens  
245 interesting questions. First, our results are in a contrast with the seminal study of Helmstetter and  
246 Fanselow, who demonstrated that injection of the opioid antagonist naltrexone reversed  
247 conditioned analgesia without impacting freezing behavior<sup>20</sup>. Our data on vIPAG SST cells rather  
248 suggest the existence of an overlap between the neuronal circuits mediating the expression of  
249 freezing behavior and those involved in the regulation of pain processes. Indeed, a recent report  
250 demonstrated that freezing expression critically depends on vIPAG disinhibitory mechanisms  
251 involving local GABAergic interneurons<sup>9</sup>. This fear circuit recruits long-range inhibitory inputs  
252 from the central medial amygdala contacting local inhibitory cells within the vIPAG, which  
253 inhibition promoted the disinhibition of vIPAG excitatory neurons projecting to the motor center,  
254 ultimately leading to freezing behavior. In this model, activating the local vIPAG inhibitory  
255 neurons reduced fear expression, an observation similar to the effect we observed when we  
256 optogenetically activated vIPAG SST cells (**Figure 4c**). This effect was accompanied in our case  
257 with a reduction of FCA, which depends on the vIPAG SST projection to the RVM (**Figure 3d**).  
258 Although these results may indicate that local vIPAG inhibitory neurons involved in freezing  
259 expression correspond to vIPAG SST cells, our observation that the optogenetic inhibition of  
260 vIPAG SST cells did not induce freezing behavior as observed in Tovote et al. suggests otherwise.  
261 First of all, it is possible that different populations of SST neurons exhibiting local or distinct  
262 remote connectivity co-exists within the vIPAG, which could explain why the optogenetic  
263 manipulation in the vIPAG decreases both freezing expression and FCA. An alternative  
264 explanation could be that other vIPAG interneuronal types are involved in freezing expression and

265 FCA. However, our optogenetic manipulation of another major class of vIPAG inhibitory cells  
266 expressing VIP did not impact FCA (**Supplementary Figure 6e-h**). Additional vIPAG  
267 microcircuits studies will be necessary to disentangle these issues.

268 Our data also indicate that the optogenetic activation of vIPAG SST cells reduced FCA during  
269 CS<sup>+</sup> presentations, whereas their inhibition was less specific and promoted FCA to both the CS<sup>-</sup>  
270 and CS<sup>+</sup> (**Figure 3**). Although we do not know whether vIPAG SST cells change their firing activity  
271 during FCA, these data suggest that vIPAG SST cells activity is reduced during FCA and that  
272 normalizing their activity using optogenetic activation is sufficient to prevent FCA. However, the  
273 fact that optogenetically activating vIPAG SST cells during CS<sup>-</sup> presentations has no effect on the  
274 pain threshold indicates that vIPAG SST cells do not play a direct role in nociception mechanisms  
275 when emotional systems are not engaged (i.e., during CS<sup>-</sup> presentations) or alternatively is  
276 indicative of a floor effect. Our data also suggest that inhibiting vIPAG SST cells activity promoted  
277 analgesia even under conditions in which FCA is not induced (i.e., during CS<sup>-</sup> presentations),  
278 further supporting the idea that antinociception in the context of FCA is specifically mediated by a  
279 reduction in the firing activity of vIPAG SST.

280 Our data also complement the classical lateral inhibition model of antinociception within the  
281 PAG, relying on the activation of PAG excitatory neurons projecting to the RVM. More precisely,  
282 in this model, analgesia is thought to occur through an opioid-dependent inhibition of GABAergic  
283 neurons, ultimately disinhibiting excitatory neurons projecting to the RVM<sup>13,21</sup>. This hypothesis  
284 was recently confirmed by optogenetic experiments in which the optogenetic activation of PAG  
285 glutamatergic neurons induced analgesia<sup>9</sup>. Our data indicate that in addition to this disinhibitory  
286 mechanism, analgesia is also mediated by the inhibition of a direct long-range inhibitory projection  
287 onto RVM neurons projecting to the DH (**Figure 6**). Thus, thermal analgesia relies on both  
288 excitatory and inhibitory pathways projecting to the RVM. Further studies will be required to

289 identify which cells types are involved at the level of the RVM and whether other forms of  
290 analgesia also rely on these excitatory and inhibitory inputs to the RVM. Finally, understanding  
291 the circuits and mechanisms mediating FCA will extend our knowledge on the interplay between  
292 emotional and pain systems.

293

## 294 **FIGURE LEGENDS**

295 **Figure 1. Emotional modulation of pain behavior. a.** Schematic of the setup and the FCA  
296 paradigm. On Day 1, mice were habituated to the context and tones. On the conditioning day, one  
297 of the tones (CS<sup>+</sup>) terminated with the onset of mild foot-shock (US) while the other tone remained  
298 neutral (CS<sup>-</sup>). 24h later, the CS-US association was tested during the retrieval where both tones are  
299 presented alone. Following retrieval, mice were submitted to the HP test. Each mouse underwent  
300 two HP trials, one for each tone. The tones were presented while the temperature gradually  
301 increased. The trial terminated once mice displayed a nociception response. **b.** During retrieval, the  
302 average freezing values for CS<sup>+</sup> was higher than CS<sup>-</sup> or baseline (BL) periods (\*\*\*,  $P < 0.001$ , one-  
303 way repeated-measures ANOVA,  $F = 160.861$ ,  $n = 12$  mice). **c.** Time of nociceptive response on  
304 the HP test during CS<sup>-</sup> and CS<sup>+</sup> trials. The emotional modulation of pain behavior led to an average  
305 increase in the nociceptive time response by 22 s (\*\*,  $P < 0.01$ , one-way repeated-measures  
306 ANOVA,  $F = 15.901$ ,  $n = 12$  mice). **d.** For the extinction protocol, 24 CS<sup>+</sup> were presented across  
307 two separate extinction sessions. After the CS-US association was extinguished, mice were  
308 submitted to the HP test. **e.** Mean freezing values throughout the extinction protocol. Mice acquired  
309 the CS-US association (1st CS<sup>+</sup> block vs BL/CS<sup>-</sup> \*\*\*,  $P < 0.001$ , one-way repeated-measures  
310 ANOVA,  $F = 149.912$ ,  $n = 10$  mice), followed by a rapid extinction (5th & 6th block of CS<sup>+</sup> vs  
311 BL/CS<sup>-</sup> ns,  $P > 0.05$ , one-way repeated measured ANOVA,  $F = 1.482$ ). **f.** After extinction, there

312 was no difference in the time of response between the two trials of the HP test (ns,  $P > 0.05$ , one-  
313 way repeated-measures ANOVA,  $F = 0.663$ ,  $n = 10$  mice). **g.** Difference in the time of nociceptive  
314 response between the  $CS^+$  and  $CS^-$  trials for the extinction (Ext,  $n = 10$  mice) and the control group  
315 (normal FCA protocol; Ctr,  $n = 12$  mice). The extinction group had a significantly lower difference  
316 in time of nociceptive response than the control group (\*,  $P < 0.05$ , One-way factorial ANOVA,  $F$   
317  $= 7.623$ ,  $n = 21$  mice). Box-whisker plots indicate median, interquartile range, and 5th - 95th  
318 percentiles of the distribution. Crosses indicate means. Bullets indicate individual mice values.

319 **Figure 2. Two distinct neuronal populations in SST- Cre mice within the PAG. a.**

320 Representative picture of single-molecular fluorescent in situ hybridization for *Sst* mRNAs in the  
321 PAG. Scale bar, 400  $\mu\text{m}$ . **b, c.** Single-molecular fluorescent in situ hybridization for *Sst* (green)  
322 and Cre (red) mRNAs in the vIPAG (left). Histograms showing the co-expression of *Sst*/*Cre* as  
323 percentage of *Sst*-expressing cells (green) and as percentage of Cre-expressing cells (red) in the  
324 dIPAG and vIPAG (right). Scale bar, 20  $\mu\text{m}$ . **d.** Single-molecular fluorescent in situ hybridization  
325 for *Sst* (red) and *Slc32a1* (green) within the dIPAG (upper panel) and vIPAG (bottom panel). Scale  
326 bar, 20  $\mu\text{m}$ . **e.** Quantification of colocalization within the dIPAG (upper panel) and vIPAG (bottom  
327 panel) of *Sst*<sup>+</sup> and *Slc32a1*<sup>+</sup>. In the dIPAG approximately 19% of *Slc32a1*<sup>+</sup> cells are *Sst*<sup>+</sup> and 17%  
328 of *Sst*<sup>+</sup> cells are *Slc32a1*<sup>+</sup>. On the contrary, in the vIPAG approximately 95% of *Slc32a1*<sup>+</sup> cells are  
329 *Sst*<sup>+</sup> and 61% of *Sst*<sup>+</sup> cells are *Slc32a1*<sup>+</sup>. **f.** Single-molecular fluorescent in situ hybridization for *Sst*  
330 (red) and *Slc17a6* (green) within the dIPAG (upper panel) and vIPAG (bottom panel). Scale bar,  
331 20  $\mu\text{m}$ . **g.** Quantification of colocalization within the dIPAG (upper panel) and vIPAG (bottom  
332 panel) of *Sst*<sup>+</sup> and *Slc17a6*<sup>+</sup>. In the dIPAG approximately 91% of *Slc17a6*<sup>+</sup> cells are *Sst*<sup>+</sup> and 38%  
333 of *Sst*<sup>+</sup> cells are *Slc17a6*<sup>+</sup>. On the contrary, in the vIPAG approximately 34% of *Slc17a6*<sup>+</sup> cells are  
334 *Sst*<sup>+</sup> and 33% of *Sst*<sup>+</sup> cells are *Slc17a6*<sup>+</sup>. White arrows indicate colocalization.

335 **Figure 3. SST<sup>+</sup> neurons in vIPAG mediate the emotional modulation of pain behavior. a.** SST-  
336 IRES-Cre mice received bilateral injection of opsins in the vIPAG, and optic fibers were implanted  
337 above the region of interest. **b.** Representative example of expression patterns of ChR2 (left) and  
338 ArchT (right) within SST<sup>+</sup> vIPAG neurons. **c, e.** Average freezing values during retrieval for ChR2-  
339 (c) and ArchT-infected mice (e) and their respective GFP-infected mice. The opsin and respective  
340 control groups were pulled together because no difference was found in the conditioning level (see  
341 **Supplementary Figure 4**). The average freezing values during CS<sup>+</sup> was higher than CS<sup>-</sup> or baseline  
342 (BL) periods (\*\*\*,  $P < 0.001$ , one-way repeated-measures ANOVA, (c)  $F = 396.787$ ,  $n = 16$  mice  
343 and (e)  $F = 280.420$ ,  $n = 23$  mice). **d.** Light activation of SST<sup>+</sup> neurons abolished the analgesic  
344 effect of the fear modulation (\*,  $P < 0.05$ ,  $n = 7$  GFP,  $n = 9$  ChR2, opsin x CSs - two-way repeated-  
345 measures ANOVA,  $F_{(1,14)} = 8.514$ ). The nociception response time for the CS<sup>+</sup> was significantly  
346 different between the ChR2 and GFP group (\*\*,  $P = 0.0091$ , unpaired t-test). For the ChR2 group,  
347 the nociception response time during CS<sup>+</sup> was equivalent to the CS<sup>-</sup> (ns,  $P = 0.4028$ , ChR2,  
348 unpaired t-test). On the contrary, the nociception response time between the CSs was different for  
349 the GFP group (\*,  $P = 0.0157$ , GFP, unpaired t-test). **f.** Light inhibition of SST<sup>+</sup> neurons increased  
350 the analgesic effect for the ArchT group when compared to the GFP (\*\*,  $P < 0.01$ ,  $n = 12$  GFP,  $n$   
351  $= 11$  ArchT, opsin effect - two-way repeated measured ANOVA,  $F_{(1,21)} = 20.548$ , post hoc  
352 Bonferroni  $P = 0.0002$ ). There was also a significant effect for the interaction between the opsins  
353 and the tones (\*\*,  $P < 0.01$ ,  $n = 12$  GFP,  $n = 11$  ArchT, opsin x CSs - two-way repeated measured  
354 ANOVA,  $F_{(1,21)} = 10.637$ ). The nociception response time for the CS<sup>-</sup> and CS<sup>+</sup> was significantly  
355 different between the ArchT and GFP group (CS<sup>-</sup>: \*\*,  $P < 0.0001$ , unpaired t-test; CS<sup>+</sup>:\*,  $P =$   
356  $0.0145$ , unpaired t-test). For the GFP group, the time of nociception response was higher for the  
357 CS<sup>+</sup> trials when compared to the CS<sup>-</sup> trials (\*\*,  $P = 0.0015$ , GFP, unpaired t-test), yet this was not  
358 the case for the ArchT group (ns,  $P = 0.9561$ , ArchT, unpaired t-test). Box-whisker plots indicate

359 median, interquartile range, and 5th - 95th percentiles of the distribution. Crosses indicate means.  
360 Bullets indicate individual mice values.

361 **Figure 4. Modulation of SST<sup>+</sup> vIPAG neurons is sufficient but not necessary to modulate**  
362 **freezing. a.** Protocol for optogenetic manipulation during fear retrieval. Day 1 and 2 were done as  
363 described previously for the FCA paradigm. During retrieval, there were 12 CS<sup>+</sup> presentations  
364 divided by three blocks. The optogenetic manipulation was done during the 2nd block of the CS<sup>+</sup>  
365 presentation. **b.** Light inhibition of SST<sup>+</sup> neurons in the vIPAG did not modulate freezing levels  
366 (ns,  $P = 0.0984$ ,  $n = 6$ , GFP 1st vs. 2nd CS<sup>+</sup>-block, unpaired t-test; ns,  $P = 0.5979$ ,  $n = 8$ , ArchT 1st  
367 vs. 2nd CS<sup>+</sup>-block, unpaired t-test). **c.** Light activation of the SST<sup>+</sup> neurons in the vIPAG had no  
368 effect on the GFP group (ns,  $P = 0.1768$ ,  $n = 9$ , GFP 1st vs 2nd CS<sup>+</sup>-block, unpaired t-test) but it  
369 transiently decreases the levels of freezing for the ChR2 group (\*\*\*,  $P = 0.001$ ,  $n = 8$ , ChR2 1st  
370 vs. 2nd CS<sup>+</sup>-block, unpaired t-test). Box-whisker plots indicate median, interquartile range, and 5th  
371 - 95th percentiles of the distribution. Crosses indicate means. Bullets indicate individual mice  
372 values. Yellow and blue shaded rectangles represent the period of optical inhibition and activation,  
373 respectively.

374 **Figure 5. Activation of vIPAG SST cells promotes spinal cord-related pain signals. a.**  
375 Optogenetic manipulation of vIPAG SST cells with concomitant noxious electrical stimulation of  
376 the paw in anesthetized mice while recording nociceptive field potentials in the lumbar spinal cord.  
377 **b.** Representative trace of nociceptive field potentials in the lumbar spinal cord before and during  
378 optogenetic activation of vIPAG SST cells (upper panel). The activation of vIPAG cells induces a  
379 significant increase in the nociceptive fields (bottom panel; OFF<sub>1</sub> =  $0.000095 \pm 0.00001$   $\mu\text{V}/\text{ms}$ ;  
380 ON =  $0.00017 \pm 0.00002$   $\mu\text{V}/\text{ms}$ , OFF<sub>2</sub> =  $0.000090 \pm 0.00002$   $\mu\text{V}/\text{ms}$ ; \*\*\*,  $P < 0.001$ , one-way  
381 repeated-measures ANOVA,  $F = 17.943$ ) **c.** Representative trace of nociceptive field potentials in

382 the lumbar spinal cord before and during optogenetic inhibition of vIPAG SST cells (upper panel).  
383 The inhibition of vIPAG cells induces a significant decrease in the nociceptive fields (bottom panel;  
384  $OFF_1 = 0.00017 \pm 0.00009 \mu\text{V}/\text{ms}$ ;  $ON = 0.00006 \pm 0.00002 \mu\text{V}/\text{ms}$ ,  $OFF_2 = 0.00012 \pm 0.00004$   
385  $\mu\text{V}/\text{ms}$ ;  $n = 6$ . \*,  $P < 0.05$ , Wilcoxon signed-rank test). **d.** Representative trace single-unit  
386 recordings of WDR neurons before and during optogenetic activation of vIPAG SST neurons  
387 (upper panel). The activation of vIPAG SST cells induces a significant and global increase in WDR  
388 response to both C and A mediated peripheral fibers (bottom panel; \*,  $P < 0.05$ , one-way repeated-  
389 measures ANOVA,  $F_{A\text{-fiber}} = 4.998$ ; \*\*\*,  $P < 0.001$ , one-way repeated-measures ANOVA,  $F_{C\text{-fiber}} =$   
390  $22.966$ ). **e.** Representative trace single-unit recordings of WDR neurons before and during  
391 optogenetic inhibition of vIPAG SST neurons (upper panel). The inhibition of vIPAG SST cells  
392 induces a significantly and, specifically, inhibition of WDR response to C-mediated peripheral  
393 fibers (bottom panel; \*\*\*,  $P < 0.001$ , Wilcoxon signed-rank test). **f.** Representative traces of single-  
394 unit recordings of WDR neurons with subthreshold electrical stimulation accompanied by  
395 optogenetic activation of vIPAG SST neurons (upper panel). The optogenetic activation of vIPAG  
396 SST cells elicits WDR response to C-mediated peripheral fibers (ns,  $P = 0.1215$ , A-fiber ON vs  
397 OFF; \*\*\*,  $P < 0.001$ , C-fibers OFF vs ON - Wilcoxon signed-rank test).

398 **Figure 6. vIPAG SST cells mediating the FCA project to RVM cells.** **a.** Representative example  
399 of expression patterns of GFP within  $SST^+$  vIPAG neurons. **b.** A representative example of the  
400 same mouse as in (a), GFP labelled fibers are present in the RVM (left panel). Higher magnification  
401 reveals putative axonic buttons in the RVM (right panel; white arrows for putative axonic buttons).  
402 **c.** SST Cre mice were injected concomitantly with GFP in the vIPAG and fluorogold in the lumbar  
403 dorsal horn of the spinal cord. **d.** Fluorogold positive neurons (red) cross vIPAG SST fibers in the  
404 RVM (green). Higher magnification shows close contacts between the putative  $SST^+$  button and



405 fluorogold<sup>+</sup> neurons or fibers (white arrows). **e.** Single-unit recordings of WDR neurons in the  
406 lumbar spinal cord during optogenetic activation of vlPAG SST inputs to the RVM (left panel).  
407 The optogenetic activation of vlPAG SST inputs to the RVM induces a significant increase in WDR  
408 response to both C and A-mediated peripheral fibers stimulation (right panel; \*, P < 0.05, A-fibers;  
409 \*\*, P < 0.01, C-fibers - Wilcoxon signed-rank test). **f.** Activation of vlPAG SST inputs to the RVM  
410 switches a subliminal peripheral stimulation in a supraliminal response (OFF = 0.06 ± 0.04 spikes;  
411 ON = 4.2 ± 1.2 spikes, n=10, \*\*, P < 0.01, OFF vs. ON - Wilcoxon signed-rank test). **g.** Windup  
412 coefficient of WDR cells is significantly increased by optogenetic activation of vlPAG SST inputs  
413 to the RVM (OFF = 28 ± 18; ON = 78 ± 22, n=6, \*\*, P < 0.01, OFF vs. ON - Wilcoxon signed-  
414 rank test). **h.** Single-unit recordings of WDR neurons in the lumbar spinal cord during optogenetic  
415 activation of vlPAG SST cells with optic fibers placed either above the vlPAG or above the lumbar  
416 spinal cord (left panel). Light delivery above the vlPAG increased the WDR response to  
417 nociceptive C-fiber stimulation but not if the light was delivered above the lumbar spinal cord  
418 (right panel; \*\*\*, P < 0.001, vlPAG ON vs. OFF; ns, P = 0.2412, Spinal cord ON vs. OFF -  
419 Wilcoxon signed-rank test).

420  
421 **Figure 7. Modulation of SST<sup>+</sup> vlPAG projecting to the RVM promoted FCA.** **a, top.** SST-  
422 IRES-Cre mice received bilateral injection of an AAV expressing Chr2 or GFP in the vlPAG, and  
423 optic fibers were implanted above the RVM. **Bottom,** Representative example of SST<sup>+</sup> vlPAG  
424 neurons terminals in the RVM. **b.** Light activation of vlPAG SST<sup>+</sup> neurons projecting to the RVM  
425 did not modulate freezing levels (ns, P = 0.0775, n = 7, GFP 1st vs. 2nd CS<sup>+</sup>-block, unpaired t-test;  
426 ns, P = 0.0642, n = 6, Chr2 1st vs. 2nd CS<sup>+</sup>-block, unpaired t-test). **c.** Average freezing values  
427 during retrieval for Chr2 and GFP-infected mice. The opsin and respective control groups were



428 pulled together because no difference was found in the conditioning level. The average freezing  
429 values during CS<sup>+</sup> was higher than CS<sup>-</sup> or baseline (BL) periods (\*\*\*,  $P < 0.001$ , one-way repeated-  
430 measures ANOVA, (c)  $F = 274.215$ ,  $n = 14$  mice). **d.** Light activation of SST<sup>+</sup> neurons abolished  
431 the analgesic effect of the fear modulation (\*\*,  $P < 0.05$ ,  $n = 7$  GFP,  $n = 6$  ChR2, opsin x CSs -  
432 two-way repeated-measures ANOVA,  $F_{(1,12)} = 19.875$ ). For the ChR2 group, the nociception  
433 response time during CS<sup>+</sup> was equivalent to the CS<sup>-</sup> (ns, ChR2, unpaired t-test  $P = 6458$ ). On the  
434 contrary, the nociception response time between the CSs was different for the GFP group (\*\*,  $P <$   
435  $0.01$ , GFP, unpaired t-test).

436

437

## 438 **METHODS**

### 439 **Subject details**

440 We used either male C57BL6/J mice (Janvier), heterozygous or homozygous SST-IRES-Cre  
441 mice (Jackson laboratory), or heterozygous VIP-IRES-Cre mice (Jackson Laboratory) age 8-14  
442 weeks that were individually housed under a 12 h light-dark cycle and provided with food and  
443 water ad libitum. All procedures were performed in accordance with standard ethical guidelines  
444 (European Communities Directive 86/60-EEC) and were approved by the committee on Animal  
445 Health and Care of Institut National de la Santé et de la Recherche Médicale and the French  
446 Ministry of Agriculture and Forestry (agreement #A3312001).

447

### 448 **Behavioral apparatus**

449 *Fear conditioned analgesia task* was performed in three different contexts (**Figure 4a**). Context  
450 A was used for *Habituation* and *Retrieval* and consisted of a plexiglass cylinder (25 x 24 cm

451 diameter) with a grey, smooth plastic floor, and house-lights. Context B was used for *Conditioning*  
452 and consisted of a square plexiglass (25 x 40 cm) with a grid floor connected to a shocker  
453 (Coulbourn Instruments) and brighter house-lights. A total of 5 scrambled foot-shocks of 1 s  
454 duration and intensity of 0.8 mA were delivered via the grid floor and served as the unconditioned  
455 stimulus (US). Context A and B were cleaned, respectively, with 70% ethanol or 1 % acetic acid  
456 between different mice. Both contexts contained an infrared beams detection that automatically  
457 scored freezing periods. Mice were considered freezing if no movement, except respiratory  
458 movement, was detected for at least 2 s.

459 Context C was used for the *Hot Plate test* (HP test). A steady increase in temperature was  
460 controlled by the Incremental Hot/Cold Plate Analgesia Meter (IITC) device. The device had a  
461 testing surface enclosed in a square plexiglass surface (20.3 x 10 x 20.5 cm) to restrain the mice  
462 movement. The mice's temperature and surroundings were recorded with an infrared digital  
463 thermographic camera (Testo 885) placed ~ 50 cm above the testing surface. The thermal camera  
464 had a spatial resolution of 320 × 240 pixels, a sampling rate of 25 Hz, and thermal sensitivity of  
465 0.03 °C at 30 °C. The testing surface of context C was cleaned with water between different mice.  
466 All three contexts were enclosed in an acoustic foam isolated box with speakers mounted on the  
467 top of each compartment. The auditory conditioned stimulus (CS) consisting of either 7.5 kHz or  
468 white-noise 50 ms pips at 1 Hz repeated 27 times, 2 ms rise and fall, 80 dB sound pressure level.

469 ***Open field task*** was performed in a square plexiglass arena (36 x 36 x 25cm). A LED mounted  
470 on the top-right side of the arena signaled the start and end of different epochs for offline analyses.  
471 A video camera recorded from above the arena at 30 fps for offline video-tracking purposes.

472 ***Real-Time Place Preference (RTPP) task*** was performed in a shuttlebox consisting of a  
473 plexiglass box (40 x 10 x 30 cm) with a floor grid, where a small plastic hurdle (1 cm height)  
474 divided the arena into two equal compartments while infrared beams detection automatically

475 monitored the mice shuttling between compartments (Imetronic). A video camera recorded from  
476 above the arena at 30 fps for offline video-tracking purposes. For both the open field and RTPP  
477 task, a free user video-tracking software (idTracker: Tracking individuals in a group by automatic  
478 identification of unmarked animals) together with in-house codes in Matlab (The MathWorks, Inc.,  
479 Natick, MA, USA) were used to analyze each condition.

## 480 **Behavioral paradigm**

481 ***Fear conditioned analgesia.*** WT Mice (n = 12) were habituated to the context and tones (Day  
482 1). Four white-noise (CS<sup>-</sup>) and four 7.5 kHz (CS<sup>+</sup>) tones were presented sequentially and without  
483 US reinforcement. In Conditioning (Day 2), five CS<sup>-</sup> and five CS<sup>+</sup> were presented in an  
484 intermingled fashion. The CS<sup>+</sup> presentations were paired with a mild foot-shock (US) at tone offset,  
485 whereas the CS<sup>-</sup> was never reinforced. The retrieval session (Day 3) was done 24h after  
486 Conditioning and in the same context as the Habituation session. As in Habituation, four CS<sup>-</sup> and  
487 four CS<sup>+</sup> were presented sequentially and without US reinforcement (**Figure 4a**).

488 Since the focus of this study was the emotional modulation of pain sensitivity, it was compulsory  
489 to evaluate the associative fear levels before measuring its impact on pain sensitivity. Two indices  
490 were computed: the discrimination index (DI), to assess the level of discrimination between CS<sup>-</sup>  
491 and CS<sup>+</sup>, and the conditioning index (CI), which indicated the level of freezing to the tone  
492 predicting the US. These indexes were calculated as follows:  $DI = \frac{(Freezing\ to\ CS^+) - (Freezing\ to\ CS^-)}{(Freezing\ to\ CS^+) + (Freezing\ to\ CS^-)}$   
493 and  $CI = DI \times (Freezing\ to\ CS^+)$ . Based on preliminary data, mice were only submitted to the HP  
494 test if  $DI \geq 0.4$  &  $CI \geq 0.3$ . Mice that did not fit the criteria were conditioned a second time. There  
495 was a minimum time interval of 2 h between the retrieval and the HP test.

496 The HP test consisted of two trials, one trial where the CS<sup>+</sup> was presented (HP\_CS<sup>+</sup>) and another  
497 where the CS<sup>-</sup> was presented (HP\_CS<sup>-</sup>). The two trials were counterbalanced within group. The

498 testing surface was set at 30 °C (**Supplementary Figure 1d**), and after a 60 s acclimatization  
499 period, its temperature gradually increased at a rate of 6 °C per minute (HP start). Tone presentation  
500 (CS<sup>+</sup> or CS<sup>-</sup>) started 130 s after the HP start. Temperature increase and tone presentation terminated  
501 concomitantly with the display of a nociception response. Valid nociception readout responses  
502 included jumping or licking the hind-paw. The effect of the emotional modulation on pain  
503 sensitivity was assessed by comparing the time (or temperature) of the nociceptive response  
504 between the two HP trials: [ $\Delta\text{HP} = (\text{HP\_CS}^+) - (\text{HP\_CS}^-)$ ]. There was a minimum of 30 min interval  
505 between the two trials for each mouse, during which mice returned to their home cage.

506 Freezing levels during the HP test were manually scored offline. Three periods for the HP  
507 freezing were defined: i. *baseline period*, 30 s before the CS onset; ii. *early period*, first 30 s of CS  
508 presentation; iii. *late period*, 30 before CS offset (**Supplementary Figure 1d**). Freezing scoring  
509 was calculated using the videos from the infrared digital thermographic camera. The nature of the  
510 trial was blinded to the researcher.

511 **Extinction training.** On Day 3 and 4, mice (n =10) were submitted to an extinction training  
512 protocol established by Courtin et al.<sup>7</sup>. Briefly, there were 4 CS<sup>-</sup> and 12 CS<sup>+</sup>, presented in a non-  
513 reinforced manner (**Figure 4d**). Mice were considered as having successfully extinguished the fear  
514 expression if the level of freezing in the last 4 CS<sup>+</sup> was not statistically different from the CS<sup>-</sup>. After  
515 fear extinction, mice were submitted to the HP test, using the same parameters as in the FCA  
516 paradigm.

517 **Stability training.** The first three days consisted of the classical FCA paradigm. On Day 4, mice  
518 (n = 10) repeated the protocol applied on Day 3 (**Supplementary Figure 3a**). All mice that passed  
519 the fear conditioning criteria (DI  $\geq$  0.4 & CI  $\geq$  0.3) on Day 3 were kept for the following day,  
520 independent of their level of Conditioning on Day 4.

521 ***Vasoconstriction assay.*** To determine if vasoconstriction was a confound of the HP test  
522 outcomes, we used a modified version of the FCA paradigm (**Supplementary Figure 3f**). During  
523 the HP test (n = 13), the temperature was not gradually increased but maintained at 30 °C while  
524 CSs were presented. The tones (CS<sup>+</sup> or CS<sup>-</sup>) were presented for 120 s, and mice were kept for an  
525 additional 50 s before the HP trial terminated. Offline, with the infrared videos, mice back and tail  
526 were measured at 30 s intervals. For each measuring point, the temperature of three spots of the  
527 two body part was averaged to create the body temperature for the back and tail for a given time  
528 point and mouse.

529 ***Basal nociception assay.*** Naïve mice (n = 10) were submitted to the HP test (**Supplementary**  
530 **Figure 2a, left panel**). Each mouse underwent two identical trials. The HP test was identical to the  
531 one described in the FCA paradigm, except no tones were presented. There was a minimum of 30  
532 min interval between the two trials, during which mice returned to a restful state on their home  
533 cage.

534 ***Tone-specific nociception assay.*** Naïve mice (n = 12) were submitted to the HP test without  
535 auditory fear conditioning (**Supplementary Figure 2a, middle panel**). Each animal underwent  
536 two trials, one trial with a 7.5 kHz tone presentation and another with a WN tone presentation. The  
537 tone presentation was counterbalanced. The HP test parameters were identical to the one described  
538 for the FCA except that both tones were unconditioned.

539 ***Conditioning-specific nociception assay.*** Mice (n = 7) were submitted to the classical FCA  
540 paradigm with one exception: on Day 3 during the HP test, no CSs were presented (**Supplementary**  
541 **Figure 2a, right panel**). Mice were submitted to two identical HP trials.

542 ***Open Field assay.*** This test was used to determine the effect of optogenetic stimulation on  
543 locomotion. Therefore, only mice from optogenetic experiments were submitted to this assay. Mice  
544 could freely move during the entire test. The locomotion assay had a total duration of 9 min and

545 was divided into 3 min epochs. The first and third epochs were OFF periods in which no optical  
546 stimulation occurred. During the second epoch, mice received optical stimulation (ON period). The  
547 optogenetic stimulation effect was analyzed by comparing the overall distance traveled between  
548 the OFF and ON epochs (**Supplementary Figure 5c, d**). Mice injected with GFP were used to test  
549 the effect of heat and light of the stimulation itself.

550 ***Real-time Place Preference assay.*** During the entire duration of the assay, mice could freely  
551 shuttle between the two compartments. Under a closed-loop stimulation, mice received photo-  
552 stimulation upon entry in one of the two compartments. The stimulated compartment was  
553 counterbalanced within the group. The optical stimulation effect was assessed by comparing the  
554 time spent in the stimulated compartment between the ChR2 and GFP groups (**Supplementary**  
555 **Figure 5f**).

556

## 557 **Virus injections and optogenetics**

558 For optogenetic manipulation of SST-Cre neurons in the vIPAG, 0.15-0.2  $\mu$ L of either ChR2  
559 (AAV5-EF1a-DIO-hChR2(H134R)-EYFP, titer:  $3.2 \times 10^{12}$  - Vector Core, University of North  
560 Carolina), ArchT (AAV9-CAG-FLEX-ArchT-GFP, titer:  $4.7 \times 10^{12}$  - Vector Core, University of  
561 North Carolina) or GFP (AAV5-FLEX-GFP, titer:  $4.5 \times 10^{12}$  - Vector Core, University of North  
562 Carolina) were bilaterally injected into the vIPAG of 8/9 weeks old SST-Cre mice from glass  
563 pipettes (tip diameter 20-30  $\mu$ m) at the following coordinates relative to bregma: - 4.4 mm AP;  $\pm$   
564 1.5 mm ML; -2.45 mm DV from dura, with a 20 degrees angle. Injection coordinates for  
565 manipulation of VIP-Cre neurons in the vIPAG were the following: - 4.4 mm AP;  $\pm$  1.35 mm ML;  
566 -2.5 mm DV from dura, with a 20 degrees angle.

567 At two weeks after the injections, mice were bilaterally implanted with custom-built optic fibers  
568 (diameter: 200  $\mu\text{m}$ ; numerical aperture: 0.39; Thorlabs) above the vIPAG at the following  
569 coordinates relative to bregma: i) SST-IRES-Cre mice: - 4.4 mm AP;  $\pm$  1.0 mm ML; -1.8 mm DV  
570 from dura, with a 10 degrees angle; ii) VIP-IRES-Cre mice: - 4.4 mm AP;  $\pm$  0.8 mm ML; -2.0 mm  
571 DV from dura, with a 10 degrees angle. Mice for RVM manipulations were implanted at the  
572 following coordinates relative to bregma: -5.8 mm AP; 0.0 mm ML; -5.2 DV from the dura. All  
573 implants were secured using three stainless steel screws and Super-Bond cement (Sun Medical).  
574 During surgery, long- and short-lasting analgesic agents were injected (Metacam, Boehringer;  
575 Lurocaïne, Vetoquinol). After surgery, mice were allowed to recover for at least five days.  
576 Afterward, mice were daily handled to familiarize themselves with being restrained for the  
577 connection of the optic fibers. Behavioral experiments were performed at least four weeks after  
578 viral injections. Only mice with correct placement of optic fibers and virus expression restricted to  
579 vIPAG were included in the analyses.

580 For optogenetic excitation, light stimulation consisted of blue light (473 nm,  $\sim$ 8-10 mW at fiber  
581 tip) delivered with 2 Hz frequency and 5 ms pulse duration. In contrast, optogenetic inhibition,  
582 light stimulation consisted of green light (532 nm,  $\sim$ 8-10 mW at fiber tip) delivered continuously.  
583 For optogenetic manipulations during the FCA paradigm of either vIPAG SST or VIP cells, the  
584 light was delivered during the HP test and paired with the tone presentation.

585 For stimulation during the fear conditioning, two sets of experiments were performed in a  
586 sequential manner. First, the foot-shock US was replaced by the optical stimulation. Then, the US  
587 became the optical stimulation combined with the foot-shock (**Supplementary Figure 7a**). For  
588 both conditions, the optogenetic stimulation started 5 s before and lasted until 5 s after CS<sup>+</sup> offset.  
589 The same mice were used for both experiments. For the manipulations during the fear retrieval,

590 there were 12 CS<sup>+</sup> presentations divided into blocks of 4 CS<sup>+</sup>. The optogenetic stimulation was  
591 paired with the second block of CS<sup>+</sup>.

## 592 **Fluorogold injection**

593 An incision between one to two cm was made slightly caudal to the peak of the dorsal hump to  
594 expose the lumbar spinal region. The vertebra of interest was identified, and then a small incision  
595 was made between the tendons and the vertebral column on either side. The vertebra was then  
596 secured using spinal adaptor clamps, and all tissue was removed from the surface of the bone.  
597 Pulled borosilicate glass capillaries (Ringcaps, disposable capillary pipettes with ring mark,  
598 DURAN, Hirschmann Laborgeräte, Germany) was inserted in the space between 2 vertebrae and  
599 allow to microinject 50 nL of fluorogold 2% in the dorsal horn of the spinal cord on both sides.

## 600 ***In vivo* electrophysiology**

601 Mice were anesthetized with isoflurane 4% for induction then 1.5% maintenance. The  
602 experiment was started as soon as there was no longer any reflex. The colorectal temperature was  
603 kept at 37 °C with a heating blanket. Two metal clamps were used to set the animal spine in a  
604 stereotactic frame (M2E, France) for stability during electrophysiological recordings. Then, a  
605 laminectomy was performed at T13-L1 to expose the lumbar part of the spinal cord. The dura mater  
606 was carefully removed. A vaseline pool was formed around the exposed spinal segments to ensure  
607 that no drug was administered beyond the area of interest. Custom-made optical fibers were placed  
608 1mm above the dorsal spinal cord for optogenetic manipulations. C-fiber-evoked field potentials  
609 were recorded in the deep lamina of the DH (at a depth range of 250 and 500 μm) with borosilicate  
610 glass capillaries (2 MΩ, filled with NaCl 684 mM; Harvard Apparatus, Cambridge, MA, USA).  
611 Field potentials were recorded with an ISODAM-amplifier (low filter: 0.1Hz to high filter: 0.1  
612 kHz; World Precision Instruments, USA) in response to electrical stimulation of the ipsilateral paw.



613 Single unit recordings of WDR DH neurons were made with the same borosilicate glass capillaries  
614 mentioned above and placed in the dorsal part of the spinal cord. The criterion for selecting a  
615 neuron was the presence of an A-fiber-evoked response (0-80 ms) followed by a C-fiber-evoked  
616 response (80-150 ms) to electrical stimulation of the ipsilateral sciatic nerve.

617 Trains (every 30 s) of electrical stimulation at two times the threshold for C-fibers were  
618 performed before, during, and after optogenetic stimulations with an optic fiber placed above the  
619 recording site. Subthreshold stimulations were performed below the threshold for C-fiber and A-  
620 fiber, respectively. Windup was recorded by ten repetitive electrical stimulations at 1 Hz at two  
621 times the C-fibers threshold.

## 622 **Histology analyses**

623 Mice were administered a lethal dose of Exagon and underwent transcardial perfusions via the  
624 left ventricle with 4% w/v paraformaldehyde (PFA) in 0.1 M PB. Following dissection, brains were  
625 post-fixed for 24 h at 4°C in 4% PFA. Brain sections of 80 µm-thick were cut on a vibratome,  
626 mounted on gelatin-coated microscope slides, and dried. For verification of correct viral injections  
627 and optic fiber location, serial 80 µm-thick slices containing the regions of interest were mounted  
628 in VectaShield (Vector Laboratories) and were imaged using an epifluorescence system (Leica DM  
629 5000) fitted with a 10-x dry objective. The location and the extent of the injections/infections were  
630 visually controlled. Only infections targeting the vIPAG and optic fibers terminating, depending  
631 on the experiment, above the vIPAG or RVM were included in the analyses. For a subset of  
632 animals, verification of both viral expression in the vIPAG and location of optic fiber in RVM,  
633 serial of 20 µm thin slices containing the RVM were incubated free-floating in 0.1 M PBS  
634 containing Triton X-100 (0.3%), Bovine Serum Albumin (1%; Sigma-Aldrich), and chicken anti-  
635 GFP antibody (1:1000; Avelabs) overnight at 4 °C. After washing in 0.1 M PBS, secondary

636 antibodies, Alexa fluor 488–conjugated goat anti-chicken (1:500), were added in 0.1-M PBS for 2  
637 hours at room temperature. Sections were finally viewed on a confocal microscope (Leica TCS  
638 SPE, Mannheim, Germany) fitted with a 20-x dry objective, and both 40-x and 63-x oil immersion  
639 1.3 NA objective and confocal image stacks (0.75  $\mu\text{m}$  steps) were acquired for each sample.

## 640 **Single molecular in situ hybridization**

641 Analyses of *Sst*, *Cre*, *Slc32a1* and *Slc17a6* mRNAs expression were performed using single  
642 molecule fluorescent in situ hybridization (smFISH). Brains from 2 Sst-Cre male mice were rapidly  
643 extracted and snap-frozen on dry ice and stored at  $-80^{\circ}\text{C}$  until use. Fourteen  $\mu\text{m}$  coronal sections  
644 of the PAG (bregma  $-4.60$  mm) were collected directly onto Superfrost Plus slides (Fisherbrand).  
645 RNAscope Fluorescent Multiplex labeling kit (ACDBio Cat No. 320850) was used to perform the  
646 smFISH assay according to manufacturer's recommendations. Probes used for staining are Mm-  
647 Sst (ACDBio Cat No. 404631), Mm-Slc32a1-C2 (ACDBio Cat No. 319191-C2), Mm-Slc17a6-C2  
648 (ACDBio Cat No. 319171-C2), Cre (ACDBio Cat No. 312281) and Mm-Sst (ACDBio Cat No.  
649 404631-C2). After incubation with fluorescent-labeled probes, slides were counterstained with  
650 DAPI and mounted with ProLong Diamond Antifade mounting medium (Thermo Fisher scientific  
651 P36961). Confocal microscopy and image analyses were carried out at the Montpellier RIO  
652 imaging facility. Image covering the entire PAG was single confocal sections acquired using  
653 sequential laser scanning confocal microscopy (Leica SP8) and stitched together as a single image.  
654 Triple-labeled images from each region of interest (dPAG and vPAG) were single confocal sections  
655 captured using sequential laser scanning confocal microscopy (Leica SP8). Values in the  
656 histograms represent co-expression as percentage of *Sst*-expressing cells (green) and as percentage  
657 of cells expressing the other markers tested (*Cre*, *Slc32a1* and *Slc17a6*) (3-4 images in the dPAG  
658 and vPAG per mouse,  $n = 2$  mice).

## 659 **Statistics**

660 All data are presented as means  $\pm$  s.e.m. Box-whisker plots indicate median, interquartile range,  
661 and 5th - 95th percentiles of the distribution. Statistical analyses were performed with StatView  
662 software. No statistical methods were used to predetermine sample sizes, but sample sizes were  
663 based on our lab prior studies. No randomization was used to assign experimental groups. Blinding  
664 for the opsin was done for optogenetics experiments. Animals used for the FCA paradigm not  
665 satisfying the fear conditioning criteria after two conditioning sessions were discarded from the  
666 study. Mice with an incorrect injection of the opsins or misplace location of the optic fibers were  
667 discarded. No other mice or data points were excluded. Significance levels are indicated as follows:  
668 \* $p < 0.05$ , \*\* $p < 0.01$ , \*\*\* $p < 0.001$ .

669 For *in vivo* electrophysiology, field potentials were measured as the area above the curve in the  
670 C-fiber range (80-300 ms). Absolute values were used to compare values in each condition (OFF  
671 vs. ON optogenetic manipulation). In single-unit recordings, the number of A- and C-fiber induced  
672 spikes of WDR neurons were measured after each electrical stimulation, during and after  
673 optogenetic manipulation. An average of the four stimulations for each WDR recorded was used  
674 for statistical analysis. For windup measurement, a series of 10 repetitive electrical stimulations at  
675 1 Hz and two times over the threshold for C-fibers were performed. A windup coefficient was  
676 measured as the sum of C-spikes of the ten different stimulations subtracted ten times the response  
677 to the first stimulation (Sum (R1+R2+...+R10)-10\*(R1)). A Wilcoxon matched-pairs signed-rank  
678 test was performed to compare the response before and during optogenetic manipulation.

679

680

## 681 **REFERENCES**

682

- 683 1 Fanselow, M. S. & Helmstetter, F. J. Conditional analgesia, defensive freezing, and  
684 benzodiazepines. *Behavioral neuroscience* **102**, 233-243, doi:10.1037//0735-  
685 7044.102.2.233 (1988).
- 686 2 Butler, R. K. & Finn, D. P. Stress-induced analgesia. *Progress in neurobiology* **88**, 184-  
687 202, doi:10.1016/j.pneurobio.2009.04.003 (2009).
- 688 3 Jennings, E. M., Okine, B. N., Roche, M. & Finn, D. P. Stress-induced hyperalgesia.  
689 *Progress in neurobiology* **121**, 1-18, doi:10.1016/j.pneurobio.2014.06.003 (2014).
- 690 4 Olango, W. M. & Finn, D. P. Neurobiology of stress-induced hyperalgesia. *Current topics*  
691 *in behavioral neurosciences* **20**, 251-280, doi:10.1007/7854\_2014\_302 (2014).
- 692 5 McWilliams, L. A., Cox, B. J. & Enns, M. W. Mood and anxiety disorders associated with  
693 chronic pain: an examination in a nationally representative sample. *Pain* **106**, 127-133,  
694 doi:10.1016/s0304-3959(03)00301-4 (2003).
- 695 6 Basbaum, A. I. & Fields, H. L. Endogenous pain control systems: brainstem spinal  
696 pathways and endorphin circuitry. *Annu Rev Neurosci* **7**, 309-338,  
697 doi:10.1146/annurev.ne.07.030184.001521 (1984).
- 698 7 Courtin, J., Chaudun, F., Rozeske, R. R., Karalis, N., Gonzalez-Campo, C., Wurtz, H.,  
699 Abdi, A., Baufreton, J., Biennu, T. C. & Herry, C. Prefrontal parvalbumin interneurons  
700 shape neuronal activity to drive fear expression. *Nature* **505**, 92-96,  
701 doi:10.1038/nature12755 (2014).
- 702 8 Samineni, V. K., Grajales-Reyes, J. G., Copits, B. A., O'Brien, D. E., Trigg, S. L., Gomez,  
703 A. M., Bruchas, M. R. & Gereau, R. W. t. Divergent Modulation of Nociception by  
704 Glutamatergic and GABAergic Neuronal Subpopulations in the Periaqueductal Gray.  
705 *eNeuro* **4**, doi:10.1523/ENEURO.0129-16.2017 (2017).
- 706 9 Tovote, P., Esposito, M. S., Botta, P., Chaudun, F., Fadok, J. P., Markovic, M., Wolff, S.  
707 B., Ramakrishnan, C., Fenno, L., Deisseroth, K., Herry, C., Arber, S. & Luthi, A. Midbrain  
708 circuits for defensive behaviour. *Nature* **534**, 206-212, doi:10.1038/nature17996 (2016).
- 709 10 Floyd, N. S., Price, J. L., Ferry, A. T., Keay, K. A. & Bandler, R. Orbitomedial prefrontal  
710 cortical projections to distinct longitudinal columns of the periaqueductal gray in the rat.  
711 *The Journal of comparative neurology* **422**, 556-578 (2000).
- 712 11 LeDoux, J. E., Iwata, J., Cicchetti, P. & Reis, D. J. Different projections of the central  
713 amygdaloid nucleus mediate autonomic and behavioral correlates of conditioned fear. *The*  
714 *Journal of neuroscience : the official journal of the Society for Neuroscience* **8**, 2517-2529  
715 (1988).
- 716 12 Vertes, R. P. Differential projections of the infralimbic and prelimbic cortex in the rat.  
717 *Synapse* **51**, 32-58, doi:10.1002/syn.10279 (2004).
- 718 13 Fields, H. State-dependent opioid control of pain. *Nature reviews. Neuroscience* **5**, 565-  
719 575, doi:10.1038/nrn1431 (2004).
- 720 14 Harris, J. A. Descending antinociceptive mechanisms in the brainstem: their role in the  
721 animal's defensive system. *Journal of physiology, Paris* **90**, 15-25 (1996).
- 722 15 Reynolds, D. V. Surgery in the rat during electrical analgesia induced by focal brain  
723 stimulation. *Science* **164**, 444-445 (1969).
- 724 16 Castilho, V. M., Macedo, C. E. & Brandao, M. L. Role of benzodiazepine and serotonergic  
725 mechanisms in conditioned freezing and antinociception using electrical stimulation of the  
726 dorsal periaqueductal gray as unconditioned stimulus in rats. *Psychopharmacology* **165**,  
727 77-85, doi:10.1007/s00213-002-1246-4 (2002).

- 728 17 Vianna, D. M. & Carrive, P. Changes in cutaneous and body temperature during and after  
729 conditioned fear to context in the rat. *The European journal of neuroscience* **21**, 2505-2512,  
730 doi:10.1111/j.1460-9568.2005.04073.x (2005).
- 731 18 Lau, B. K. & Vaughan, C. W. Descending modulation of pain: the GABA disinhibition  
732 hypothesis of analgesia. *Current opinion in neurobiology* **29**, 159-164,  
733 doi:10.1016/j.conb.2014.07.010 (2014).
- 734 19 Lein, E. S., Hawrylycz, M. J., Ao, N., Ayres, M., Bensinger, A., Bernard, A., Boe, A. F.,  
735 Boguski, M. S., Brockway, K. S., Byrnes, E. J., Chen, L., Chen, L., Chen, T. M., Chin, M.  
736 C., Chong, J., Crook, B. E., Czaplinska, A., Dang, C. N., Datta, S., Dee, N. R., Desaki, A.  
737 L., Desta, T., Diep, E., Dolbeare, T. A., Donelan, M. J., Dong, H. W., Dougherty, J. G.,  
738 Duncan, B. J., Ebbert, A. J., Eichele, G., Estin, L. K., Faber, C., Facer, B. A., Fields, R.,  
739 Fischer, S. R., Fliss, T. P., Frensley, C., Gates, S. N., Glattfelder, K. J., Halverson, K. R.,  
740 Hart, M. R., Hohmann, J. G., Howell, M. P., Jeung, D. P., Johnson, R. A., Karr, P. T.,  
741 Kawal, R., Kidney, J. M., Knapik, R. H., Kuan, C. L., Lake, J. H., Laramee, A. R., Larsen,  
742 K. D., Lau, C., Lemon, T. A., Liang, A. J., Liu, Y., Luong, L. T., Michaels, J., Morgan, J.  
743 J., Morgan, R. J., Mortrud, M. T., Mosqueda, N. F., Ng, L. L., Ng, R., Orta, G. J., Overly,  
744 C. C., Pak, T. H., Parry, S. E., Pathak, S. D., Pearson, O. C., Puchalski, R. B., Riley, Z. L.,  
745 Rockett, H. R., Rowland, S. A., Royall, J. J., Ruiz, M. J., Sarno, N. R., Schaffnit, K.,  
746 Shapovalova, N. V., Sivasay, T., Slaughterbeck, C. R., Smith, S. C., Smith, K. A., Smith,  
747 B. I., Sodt, A. J., Stewart, N. N., Stumpf, K. R., Sunkin, S. M., Sutram, M., Tam, A.,  
748 Teemer, C. D., Thaller, C., Thompson, C. L., Varnam, L. R., Visel, A., Whitlock, R. M.,  
749 Wohnoutka, P. E., Wolkey, C. K., Wong, V. Y., Wood, M., Yaylaoglu, M. B., Young, R.  
750 C., Youngstrom, B. L., Yuan, X. F., Zhang, B., Zwingman, T. A. & Jones, A. R. Genome-  
751 wide atlas of gene expression in the adult mouse brain. *Nature* **445**, 168-176,  
752 doi:10.1038/nature05453 (2007).
- 753 20 Helmstetter, F. J. & Fanselow, M. S. Effects of naltrexone on learning and performance of  
754 conditional fear-induced freezing and opioid analgesia. *Physiol Behav* **39**, 501-505,  
755 doi:10.1016/0031-9384(87)90380-5 (1987).
- 756 21 Moreau, J. L. & Fields, H. L. Evidence for GABA involvement in midbrain control of  
757 medullary neurons that modulate nociceptive transmission. *Brain research* **397**, 37-46,  
758 doi:10.1016/0006-8993(86)91367-3 (1986).

759

## 760 **ACKNOWLEDGMENTS**

761 We thank the Herry team for fruitful discussions and careful reading of the manuscript; K.  
762 Deisseroth and E. Boyden for generously sharing material, S. Laumond, J. Tessaire and the  
763 technical staff of the housing and experimental animal facility of the Neurocentre Magendie.  
764 Microscopy was performed in the Bordeaux Imaging Center of the CNRS-INSERM and Bordeaux  
765 University, member of France BioImaging. This work was supported by grants from the French  
766 National Research Agency (ANR-FEARLESSPAIN, ANR-DOPAFEAR, ANR-10-EQPX-08

767 OPTOPATH) and the Fondation pour la Recherche Médicale (FRM-PhD grant to NW 2020-2021).

768

## 769 **AUTHOR CONTRIBUTIONS**

770 N.W and S.V performed behavioral experiments. N.W and D.J performed optogenetic experiments  
771 on freely moving animals. F.A performed electrophysiological and optogenetic experiments on  
772 anesthetized animals. L.C, E.V, N.W, F.A, D.J and GZ performed histology. N.W, M.L, S.V. P.F  
773 and C.H. designed the experiments. N.W, F.A, D.J and E.V analysed the data, N.W, P.F and C.H  
774 wrote the paper.

775

## 776 **SUPPLEMENTARY FIGURES**

777 **Supplementary Figure 1: Fear-conditioned analgesia behavior.** **a.** During habituation, the  
778 freezing levels for the context (BL) and the two tones were low but significantly different (\*\*\*,  $P$   
779  $< 0.001$ , one-way repeated-measures ANOVA,  $F = 15.562$ ,  $n = 12$ ). **b.** Conditioning curves for  $CS^+$   
780 and  $CS^-$ . Overall, average freezing levels for BL was different when compared to the  $CS$ s (\*\*\*,  $P$   
781  $< 0.001$ , one-way repeated-measures ANOVA,  $F = 9.273$ ,  $n = 12$ ). Freezing levels for the last tone  
782 presentation during conditioning was not significantly different between  $CS^+$  and  $CS^-$  (ns,  $P =$   
783  $0.7805$ , one-way repeated-measures ANOVA,  $F = 0.082$ ,  $n = 12$ ) **c.** -Temperature at which a  
784 nociceptive behavioral response was observed in the HP. The temperature of nociception response  
785 was higher during  $CS^+$  trials when compared to the  $CS^-$  trials (\*\*,  $P < 0.01$ , one-way repeated  
786 measures ANOVA,  $F = 20.067$ ,  $n = 12$ ). **d.** Schematics of the HP kinetics. Mice had 1 min to  
787 acclimatize to the context. Then the temperature steadily increase at 6 °C per min (HP start). The  
788  $CS$ s started 130 s after the HP start and continued until mice displayed a nociception response

789 (licking the hind-paw or jumping). At this point, both the CS and the temperature increase stopped,  
790 ending the trial. Offline, 3 points were determined: i. *Baseline*, 30 s before CS onset; ii. *Early*, first  
791 30 s of the CS; iii. *Late*, last 30 s of the CS offset. In purple, an exemplary trace of a trial recorded  
792 with the infrared digital thermographic camera. **e.** Freezing levels during the HP test for CS<sup>-</sup> and  
793 CS<sup>+</sup> presentation. Freezing levels were measured offline during *baseline*, *early* and *late* periods  
794 (see Methods). Freezing was significantly higher during the CS<sup>+</sup> presentation but only during the  
795 early period (\*\*\*,  $P < 0.001$ , one-way repeated measures ANOVA,  $F = 94.753$ ,  $n = 12$ ). Box-  
796 whisker plots indicate median, interquartile range, and 5th - 95th percentiles of the distribution.  
797 Crosses indicate means. Bullets indicate individual mice values.

798 **Supplementary Figure 2: FCA depends on associative processes. a, Left**, protocol for the basal  
799 nociceptive assay: mice were submitted to two HP trials without conditioning nor tone presentation.  
800 **Center**, protocol for the tone-specific assay: mice were submitted to two HP trials paired with tone  
801 presentation (7.5 kHz or WN). **Right**, protocol for the conditioning-specific assay: mice were  
802 submitted to auditory fear conditioning. However, during the HP test, no CSs were presented. **b.**  
803 Mice submitted to auditory fear conditioning. During retrieval, the average freezing values for CS<sup>+</sup>  
804 was higher compared to CS<sup>-</sup> or baseline (BL) periods (\*\*\*,  $P < 0.001$ , one-way repeated-measures  
805 ANOVA,  $F = 228.840$ ,  $n = 7$  mice). **c, d.** Time and temperature of nociception response for all the  
806 tests mentioned above. Fear conditioning induced analgesia compared to the basal nociception and  
807 the tone-specific assay (Response latency: \*\*\*,  $P < 0.001$ , two-way repeated measures ANOVA,  
808 type of assay  $F_{(2,26)} = 11.567$ , post hoc Bonferroni  $P_{FC \text{ vs basal nociception}} < 0.001$  and  $P_{FC \text{ vs tone assay}} =$   
809  $0.0013$  ; Temperature : \*\*,  $P < 0.01$ , two-way repeated measures ANOVA, type of assay  $F_{(2,26)} =$   
810  $8.510$  post hoc Bonferroni  $P_{FC \text{ vs basal nociception}} = 0.0004$  and  $P_{FC \text{ vs tone assay}} = 0.007$ ). Trials between  
811 the same type of test were not significantly different (Response latency: ns,  $P > 0.05$ , two-way



812 repeated measures ANOVA, trial effect  $F_{(1,26)} = 0.380$ ; Temperature: ns,  $P > 0.05$ , two-way repeated  
813 measures ANOVA, trial effect  $F_{(1,26)} = 0.093$ ). Box-whisker plots indicate median, interquartile  
814 range and 5th - 95th percentiles of the distribution. Crosses indicate means. Bullets indicate  
815 individual mice values. **e**, After fear extinction, there was no difference in temperature response  
816 between the two CSs (ns,  $P > 0.05$ , one-way repeated measures ANOVA,  $F = 1.071$ ,  $n = 10$  mice).

817 **Supplementary Figure 3: The FCA paradigm is stable and is not mediated by changes in**  
818 **body temperature. a.** Protocol for stability training (see methods). Mice were submitted to two  
819 rounds of the FCA paradigm. During retrieval (**b**, **c**), average freezing values during CS<sup>+</sup> was higher  
820 than CS<sup>-</sup> or baseline (BL) periods (\*\*\*,  $P < 0.001$ , one-way repeated-measures ANOVA,  $F_{\text{retrieval1}}$   
821 (**b**) = 558.250 /  $F_{\text{retrieval2}}$  (**c**) = 55.997,  $n = 10$  mice). No differences were observed between the  
822 freezing levels of retrieval 1 (**b**) and retrieval 2 (**c**) (ns,  $P > 0.05$ , two-way repeated-measures  
823 ANOVA,  $F_{(1,9)} = 4.078$ ,  $n = 10$  mice). **d**, **e**. Time of nociception response during CS<sup>-</sup> and CS<sup>+</sup> trials.  
824 The emotional modulation of pain behaviour increased the time of nociception response in HP1 (**d**,  
825 Response latency : \*\*,  $P < 0.01$ , one-way repeated-measures ANOVA,  $F = 16.435$ ,  $n = 10$  mice;  
826 Temperature: \*\*,  $P < 0.01$ , one-way repeated-measures ANOVA,  $F = 26.876$ ,  $n = 10$  mice) and in  
827 HP2 (**e**, Response latency : \*,  $P < 0.05$ , one-way repeated-measures ANOVA,  $F = 6.046$ ,  $n = 10$   
828 mice; Temperature: \*,  $P < 0.05$ , one-way repeated-measures ANOVA,  $F = 7.272$ ,  $n = 10$  mice).  
829 No differences were found in the pain responses between the two tests (Response latency: ns,  $P >$   
830  $0.05$ , test effect, two-way repeated-measures ANOVA,  $F_{(1,9)} = 0.134$ ,  $n = 10$  mice; Temperature:  
831 ns,  $P > 0.05$ , test effect, two-way repeated-measures ANOVA,  $F_{(1,9)} = 0.160$ ,  $n = 10$  mice). **f**.  
832 Schematic representation of the protocol used (**top**). After fear conditioning, mice were submitted  
833 to the HP test in which the temperature of the testing surface was kept at 30 °C for the entire  
834 duration of the test. The CSs were introduced at 130 s and were played for 120 s. Mice were kept



835 in the HP device for another 60 s. The temperature of the mice back and tail were measured by the  
836 infrared digital thermographic camera (**bottom**) and analysed offline (see Methods). The average  
837 temperature of the mice back (**g**) and tail (**h**) while the CS<sup>+</sup> or the CS<sup>-</sup> were presented. There were no  
838 differences on body temperature for the different CSs trials (ns,  $P > 0.05$ , two-way repeated-  
839 measures ANOVA,  $F_{(1,11)} \text{ back} = 0.328 / F_{(1,11)} \text{ tail} = 0.191$ ,  $n = 13$  mice). Dashed lines correspond  
840 to the average time of nociception response for the CS<sup>+</sup> (red) and CS<sup>-</sup> (blue) during the standard  
841 FCA protocol. Box-whisker plots indicate median, interquartile range, and 5th - 95th percentiles  
842 of the distribution. Crosses indicate means. Bullets indicate individual mice values.

843 **Supplementary Figure 4: Comparable fear levels prior to the HP test.** After retrieval, fear  
844 conditioning levels between the opsins and their respective GFP group was tested to ensure  
845 equivalent fear levels. The discrimination index (see methods) between the GFP and ChR2 (**a**, ns,  
846  $P > 0.05$ , one-way factorial ANOVA,  $F = 0.280$ ,  $n = 16$  mice) or ArchT (**b**, ns,  $P > 0.05$ , one-way  
847 factorial ANOVA,  $F = 0.573$ ,  $n = 23$  mice) were not significantly different. All the mice  
848 discriminated equally between CSs. The conditioning index (see methods) between the GFP and  
849 ChR2 (**c**, ns,  $P > 0.05$ , one-way factorial ANOVA,  $F = 1.553$ ,  $n = 16$  mice) or ArchT (**d**, ns,  $P >$   
850  $0.05$ , one-way factorial ANOVA,  $F = 2.455$ ,  $n = 23$  mice) were also not significantly different. All  
851 mice displayed a similar high freezing level to the CS<sup>+</sup>. Box-whisker plots indicate median,  
852 interquartile range, and 5th - 95th percentiles of the distribution. Crosses indicate means. Bullets  
853 indicate individual mice values.

854 **Supplementary Figure 5: Optogenetic controls for SST vIPAG neurons mediating FCA. a.**  
855 Optogenetic activation of SST<sup>+</sup> neurons abolished the analgesic effect induced during exposure to  
856 the CS<sup>+</sup> (\*,  $P < 0.05$ ,  $n = 7$  GFP,  $n = 9$  ChR2, opsin x CSs - two-way repeated-measures ANOVA,  
857  $F_{(1,14)} = 11.400$ ). The temperature of the nociception response for the CS<sup>+</sup> was significantly different

858 between the Chr2 and GFP group (\*\*,  $P = 0.0081$ , unpaired t-test). For the Chr2 group, the  
859 temperature of nociception response during  $CS^+$  was equivalent to the  $CS^-$  (ns,  $P = 0.3459$ , Chr2,  
860 unpaired t-test). On the contrary, the temperature of the nociception response between the CSs was  
861 different for the GFP group (\*,  $P = 0.0108$ , GFP, unpaired t-test). **b.** Optogenetic inhibition of  $SST^+$   
862 neurons augmented the analgesic effect for the ArchT group when compared to the GFP (\*\*,  $P <$   
863  $0.01$ ,  $n = 12$  GFP,  $n = 11$  ArchT, opsin effect - two-way repeated-measures ANOVA,  $F_{(1,21)} =$   
864  $18.020$ , post hoc Bonferroni  $P = 0.0042$ ). The effect was also significant for the interaction between  
865 the opsins and the tones (\*\*,  $P < 0.01$ ,  $n = 12$  GFP,  $n = 11$  ArchT, opsin x CSs - two-way repeated-  
866 measures ANOVA,  $F_{(1,21)} = 10.841$ ). The nociception temperature response for the  $CS^-$  and  $CS^+$   
867 was significantly different between the ArchT and GFP group ( $CS^-$ : \*\*,  $P < 0.0001$ , unpaired t-test;  
868  $CS^+$ : \*,  $P = 0.0472$ , unpaired t-test). For the GFP group, the temperature of nociception response  
869 was higher for the  $CS^+$  trials when compared to the  $CS^-$  trials (\*\*, GFP, unpaired t-test  $P = 0.0014$ ),  
870 yet this was not the case for the ArchT group (ns, ArchT, unpaired t-test  $P = 0.9288$ ). **c.** Optogenetic  
871 excitation of  $SST^+$  vIPAG neurons was performed during the ON epoch (blue shaded area), and the  
872 average distance travelled was not different from the OFF epochs when comparing the two opsins  
873 (ns,  $P > 0.05$ ,  $n = 7$  GFP,  $n = 9$  Chr2, opsin x distance - two-way repeated-measures ANOVA,  
874  $F_{(2,28)} = 0.685$ ). **b.** Optogenetic inhibition of  $SST^+$  vIPAG neurons was performed during the ON  
875 epoch (yellow shaded area) and the average distance travelled was not different from the OFF  
876 epochs when comparing the two opsins (ns,  $P > 0.05$ ,  $n = 12$  GFP,  $n = 11$  ArchT, opsin x distance  
877 - two-way repeated measures ANOVA,  $F_{(2,42)} = 0.924$ ). **e.** Real-time place-preference location plot  
878 from a representative animal while submitted to optogenetic activation of  $SST$  vIPAG neurons in  
879 the left compartment throughout the 15-min session. **f.** There was no difference between Chr2-  
880 expressing mice and the control group in the time spent on the stimulated compartment (ns,  
881 unpaired t-test  $P = 0.19$ ). Box-whisker plots indicate median, interquartile range and 5th - 95th

882 percentiles of the distribution. Crosses indicate means. Bullet points indicate individual mice  
883 values.

884 **Supplementary Figure 6: Optogenetic effect observed during FCA is not due to alteration of**  
885 **somatostatin levels nor mediated by VIP vIPAG neurons. a.** SST-IRES-Cre heterozygotic mice  
886 received a bilateral injection of opsins in the vIPAG, and optic fibers were implanted above the  
887 region of interest. **b.** A representative example of expression patterns of ChR2 within SST<sup>+</sup> vIPAG  
888 neurons. **c.** Average freezing values during retrieval. The ChR2 and GFP group were pulled  
889 together because no differences were found in the conditioning level (data not shown). The average  
890 freezing values during CS<sup>+</sup> was higher than CS<sup>-</sup> or baseline (BL) periods (\*\*\*,  $P < 0.0001$ , one-  
891 way repeated-measures ANOVA,  $F = 293.847$ ,  $n = 13$  mice). **d.** Optogenetic activation of SST<sup>+</sup>  
892 heterozygotic neurons abolished the analgesic effect of the fear modulation (\*\*,  $P < 0.01$ ,  $n = 6$   
893 GFP,  $n = 7$  ChR2, opsin x CSs - two-way repeated-measures ANOVA,  $F_{(1,11)} = 12.390$ ). The  
894 temperature of the nociception response for the CS<sup>+</sup> was significantly different between the ChR2  
895 and GFP group (\*,  $P = 0.0200$ , unpaired t-test). For the ChR2 group, the latency of nociception  
896 response during CS<sup>+</sup> was equivalent to the CS<sup>-</sup> (ns, ChR2, unpaired t-test  $P = 0.4419$ ). On the  
897 contrary, the latency of nociception response between the CSs was different for the GFP group (\*\*,  
898 GFP, unpaired t-test  $P = 0.0011$ ). **e.** VIP-IRES-Cre mice received a bilateral injection of opsins in  
899 the vIPAG, and optic fibers were implanted above the region of interest. **f.** Representative example  
900 of the expression pattern of ArchT within VIP<sup>+</sup> vIPAG neurons. **g.** The ArchT and GFP groups  
901 were pulled together because no differences were found in the conditioning level (data not shown).  
902 The average freezing values during CS<sup>+</sup> was higher than CS<sup>-</sup> or baseline (BL) periods (\*\*\*,  $P <$   
903  $0.0001$ , one-way repeated-measures ANOVA,  $F = 147.078$ ,  $n = 10$  mice). **h.** Optogenetic inhibition  
904 of VIP<sup>+</sup> neurons did not change the analgesic effect for the ArchT group when compared to the

905 GFP (ns,  $P > 0.05$ ,  $n = 5$  GFP,  $n = 5$  ArchT, opsin effect - two-way repeated measure ANOVA,  
906  $F_{(1,8)} = 1.527$ ). The effect was also not significant for the interaction between opsins and tones (ns,  
907  $P > 0.05$ ,  $n = 5$  GFP,  $n = 5$  ArchT, opsin x CSs - two-way repeated measured ANOVA,  $F_{(1,8)} =$   
908  $0.398$ ). The latency of nociception response was higher for the CS<sup>+</sup> trials when compared to the  
909 CS<sup>-</sup> trials (\*\*, unpaired t-test  $P_{\text{GFP}} = 0.002 / P_{\text{ArchT}} = 0.0002$ ). Scale bars, 0.5 mm Box-whisker plots  
910 indicate median, interquartile range, and 5th - 95th percentiles of the distribution. Crosses indicate  
911 means. Bullet points indicate individual mice values.

912 **Supplementary Figure 7: SST vIPAG neurons do not modulate the CS-US association. a.**

913 Protocol for optogenetic manipulations during fear conditioning. On Day 2, mice received 5 CS-  
914 US associations. The US was either optogenetic stimulation alone or optogenetic stimulation plus  
915 foot-shock. **b.** Average freezing curve during the CS-US association of optogenetic stimulation  
916 alone. There was no difference in the overall freezing levels for the CS<sup>-</sup> and CS<sup>+</sup> between Chr2  
917 and GFP (ns,  $P > 0.05$ , optogenetic stimulation effect - two-way repeated-measures ANOVA,  $F_{(1,11)}$   
918  $= 0.983$ ,  $n = 13$  mice). **c.** During retrieval, average freezing values for CS<sup>+</sup> was not significantly  
919 different from CS<sup>-</sup> periods (ns,  $P > 0.05$ , CSs effect - two-way repeated-measures ANOVA,  $F_{(1,11)}$   
920  $= 0.095$ ,  $n = 13$  mice). There was no effect on fear expression upon activation of SST<sup>+</sup> vIPAG  
921 neurons as an US (ns,  $P > 0.05$ , CSs x opsin effect - two-way repeated-measures ANOVA,  $F_{(1,11)} =$   
922  $3.020$ ,  $n = 13$  mice). **d.** Average freezing curve during the CS-US association of optogenetic  
923 stimulation plus foot-shock. There was no difference in the overall freezing levels for the CS<sup>+</sup> and  
924 CS<sup>-</sup> between Chr2 and GFP (ns,  $P > 0.05$ , optogenetic stimulation effect - two-way repeated-  
925 measures ANOVA,  $F_{(1,11)} = 0.9575$ ,  $n = 13$  mice). **e.** During retrieval, the average freezing values  
926 during CS<sup>+</sup> was higher than CS<sup>-</sup> or baseline (BL) periods for both GFP and Chr2 (\*\*\*,  $P < 0.001$ ,  
927 one-way repeated-measures ANOVA,  $F_{\text{GFP}} = 146.847$ ,  $n = 6$  mice /  $F_{\text{Chr2}} = 40.793$ ,  $n = 7$  mice).

928 However, there was no difference of the fear expression by the activation of the SST<sup>+</sup> vIPAG  
929 neurons (ns,  $P > 0.05$ , CSs x opsin effect - two-way repeated-measures ANOVA,  $F_{(1,11)} = 0.110$ ;  
930 (ns,  $P > 0.05$ , CSs x opsin effect - two-way repeated-measures ANOVA,  $F_{(1,11)} = 0.110$ ,  $n = 13$   
931 mice). Box-whisker plots indicate median, interquartile range, and 5th - 95th percentiles of the  
932 distribution. Crosses indicate means. Grey bullet points indicate individual mice values.

933  
934 **Supplementary Figure 8: Windup protocol during optogenetic manipulation.** Repetitive  
935 suprathreshold stimulations induce a progressive increase in WDR response, called the windup  
936 effect. **a.** Optogenetic activation of vIPAG SST cells increased the windup coefficient (\*\*,  $P <$   
937  $0.01$ , OFF vs. ON – Wilcoxon matched-pairs signed-rank test). **b.** Optogenetic inhibition decreased  
938 the windup coefficient (\*,  $P < 0.05$ , OFF vs. ON – Wilcoxon matched-pairs signed-rank test). **c.**  
939 Mice expressing GFP in SST vIPAG, optogenetic manipulation of the SST vIPAG had no effect  
940 on the windup effect (ns,  $P > 0.05$ , OFF vs. ON – Wilcoxon matched-pairs signed-rank test).

941  
942 **Supplementary Figure 9: Optogenetic manipulation of GFP expressing vIPAG neurons had**  
943 **no effect on nociception.** **a.** Single-unit recordings of WDR neurons in the lumbar spinal cord  
944 during optogenetic manipulation of GFP expressing SST vIPAG inputs to the RVM (left panel).  
945 Light illumination of vIPAG SST inputs to the RVM had no effect in WDR response to both C and  
946 A-mediated peripheral fibers stimulation (right panel; ns,  $P > 0.05$ , Wilcoxon signed-rank test). **b.**  
947 Light illumination of vIPAG SST inputs to the RVM did not change the subliminal peripheral  
948 stimulation in a supraliminal response (ns,  $P > 0.05$ , Wilcoxon signed-rank test). **c.** Windup  
949 coefficient of WDR cells did not change upon light illumination of vIPAG SST inputs to RVM (ns,  
950  $P > 0.05$ , Wilcoxon signed-rank test).

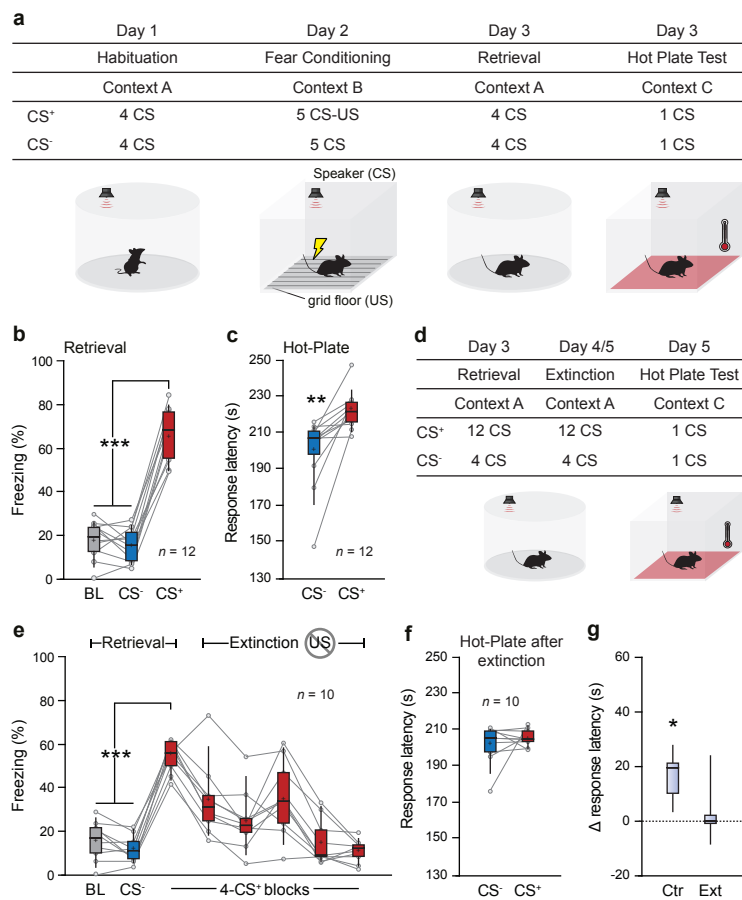

Winke et al., Figure 1



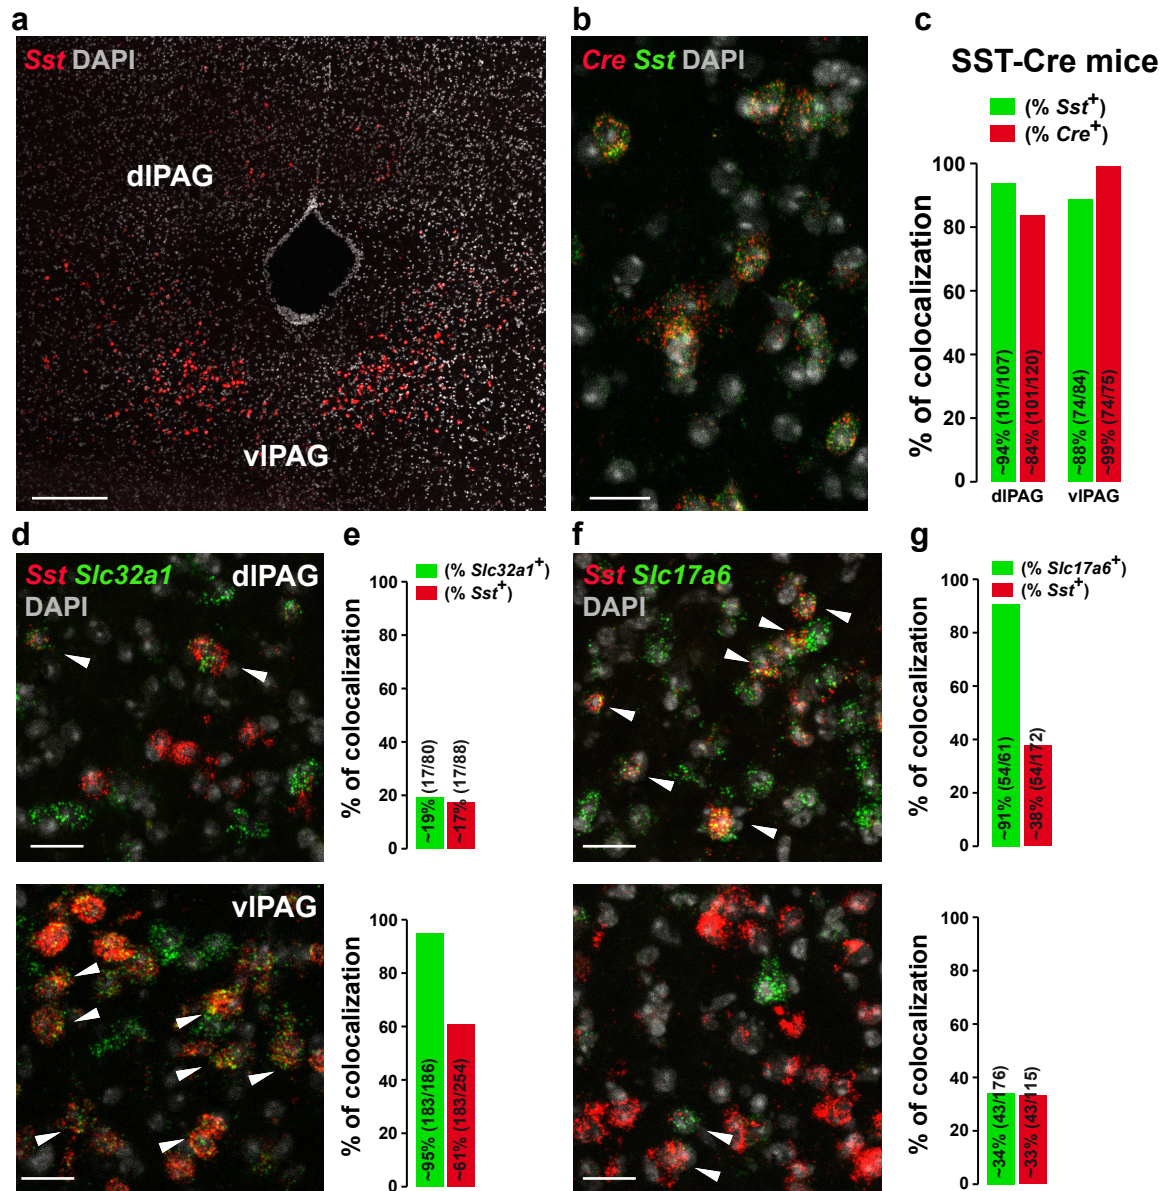

Winke et al., Figure 2

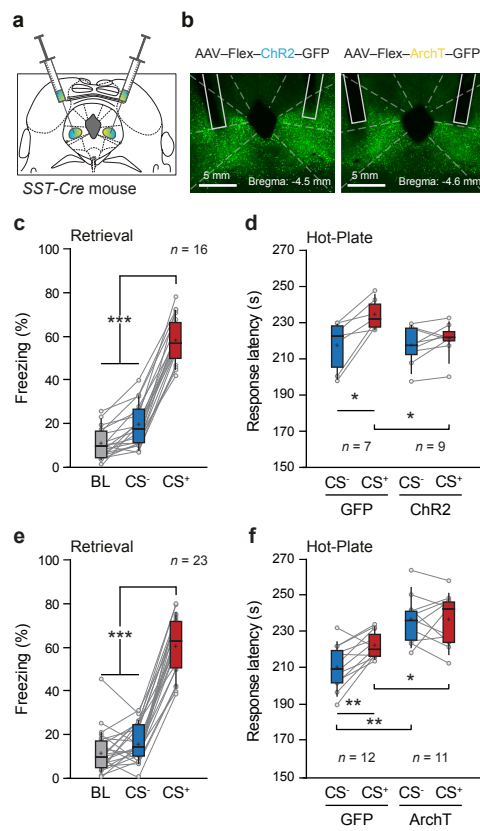

Winke et al., Figure 3



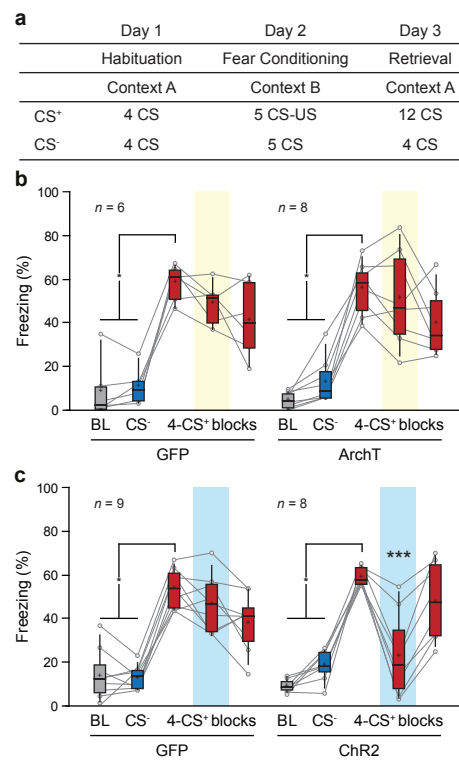

Winke et al., Figure 4

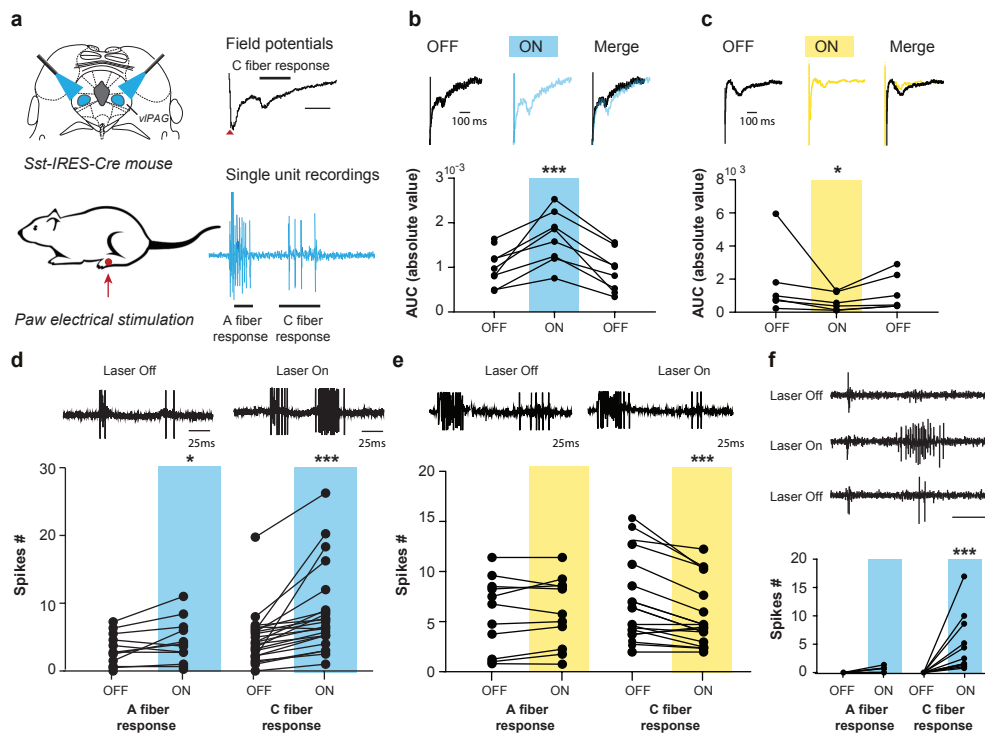

Winke et al., Figure 5

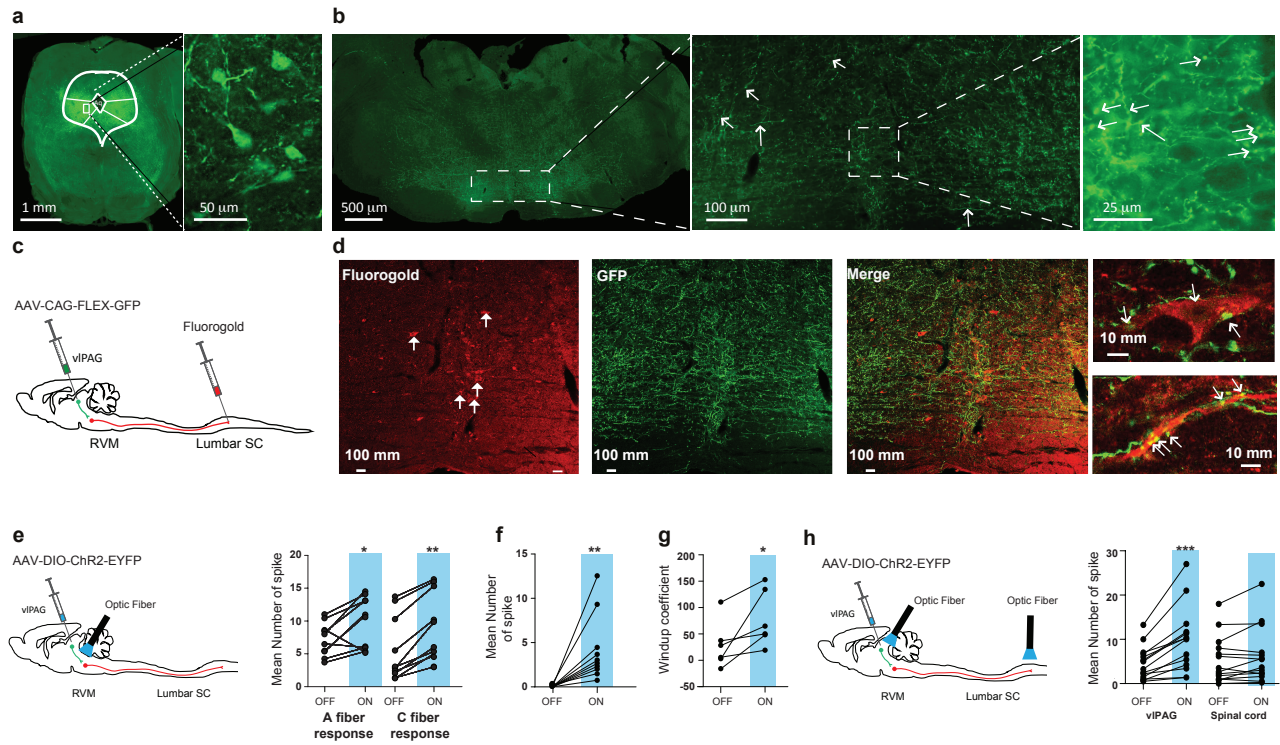

Winke et al., Figure 6

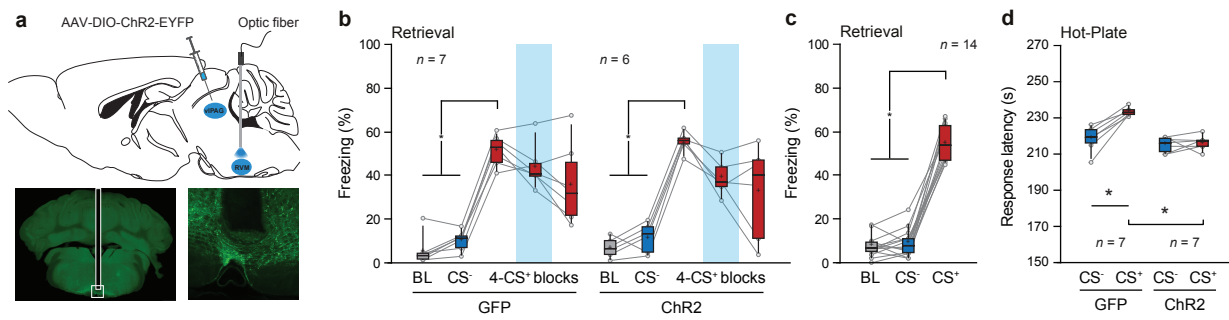

Winke et al., Figure 7
